# Supplementary material
Source: PubMed Central journal article supplement (PMC4615317)

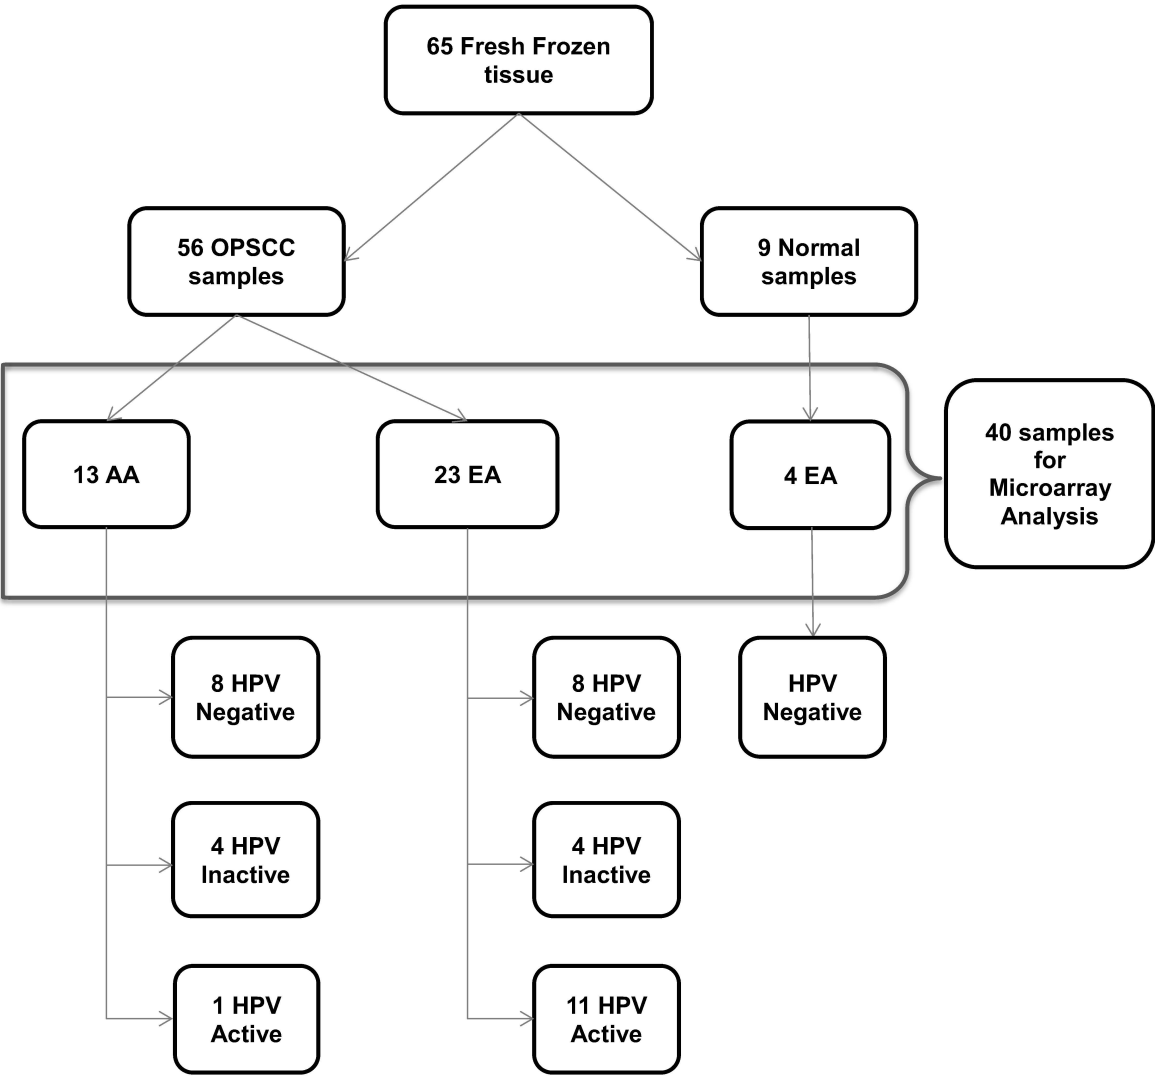

**65 Fresh Frozen tissue**

**56 OPSCC samples**

**9 Normal samples**

**13 AA**

**23 EA**

**4 EA**

**40 samples for Microarray Analysis**

**8 HPV Negative**

**4 HPV Inactive**

**1 HPV Active**

**8 HPV Negative**

**4 HPV Inactive**

**11 HPV Active**

**HPV Negative**

Color Range

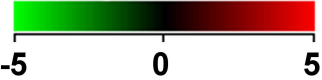

- EA-HPV Active
- EA-HPV Inactive
- EA-HPV Negative

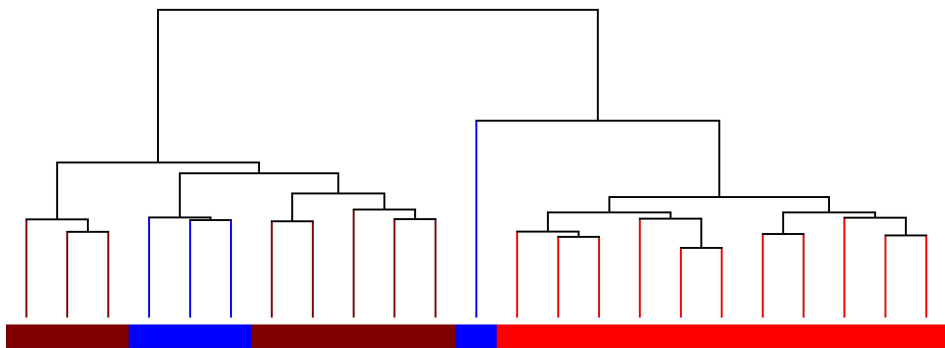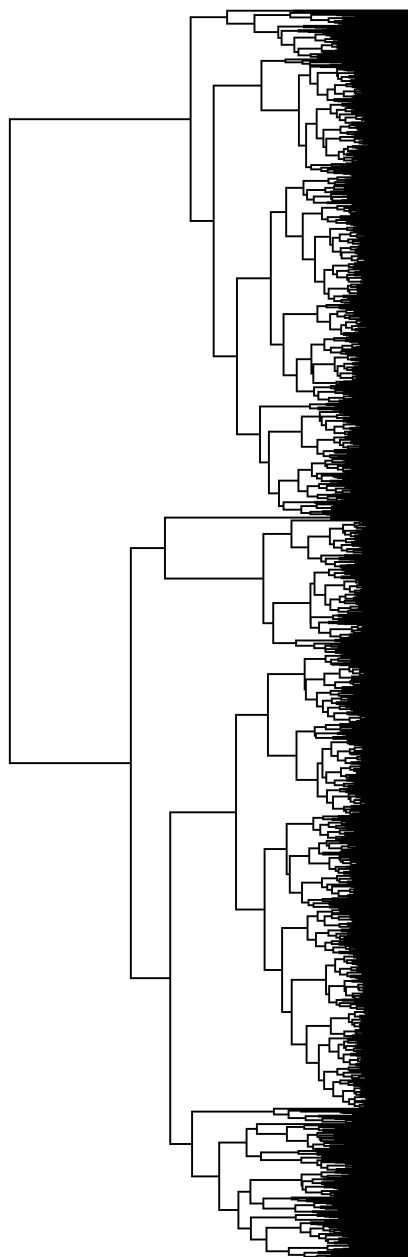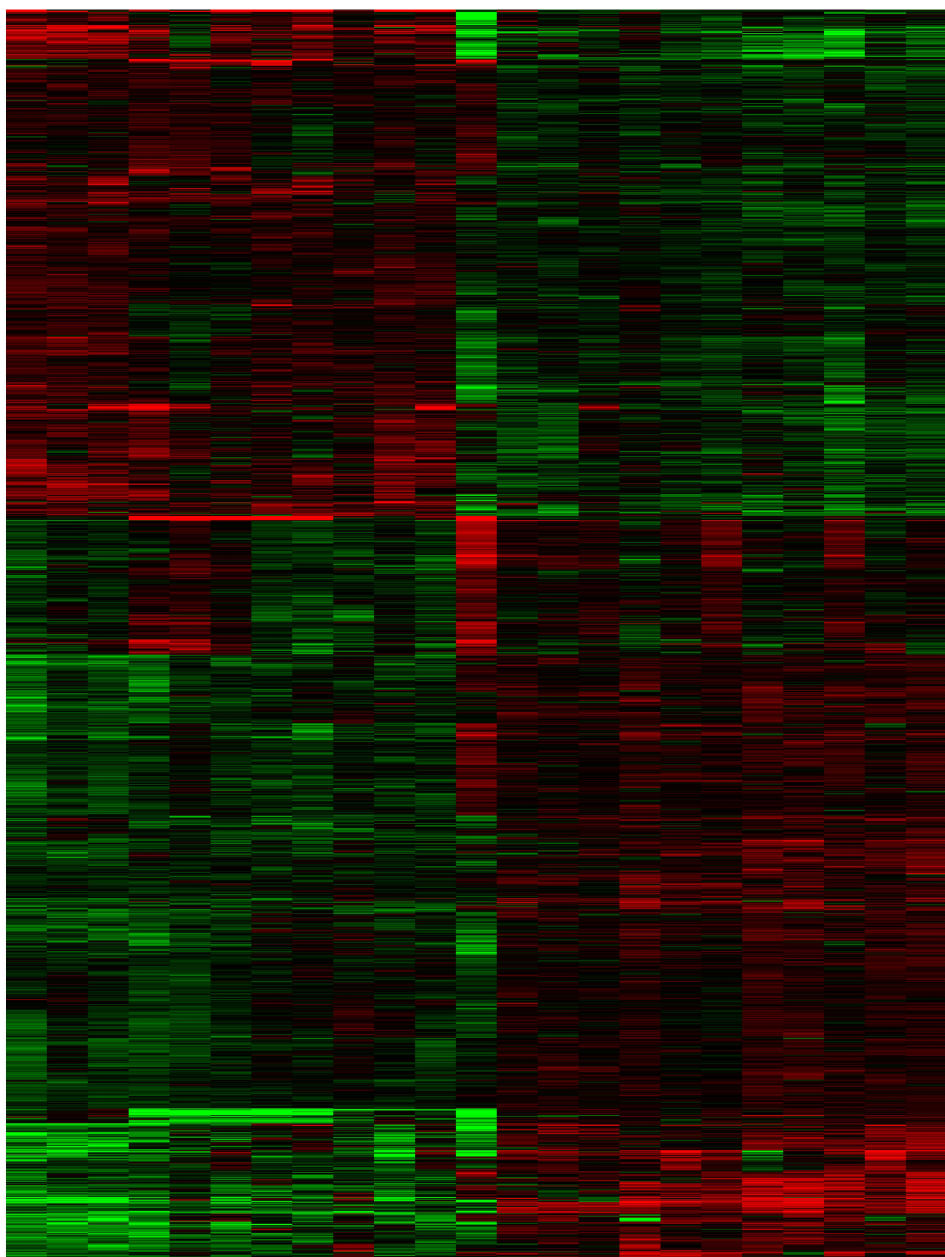

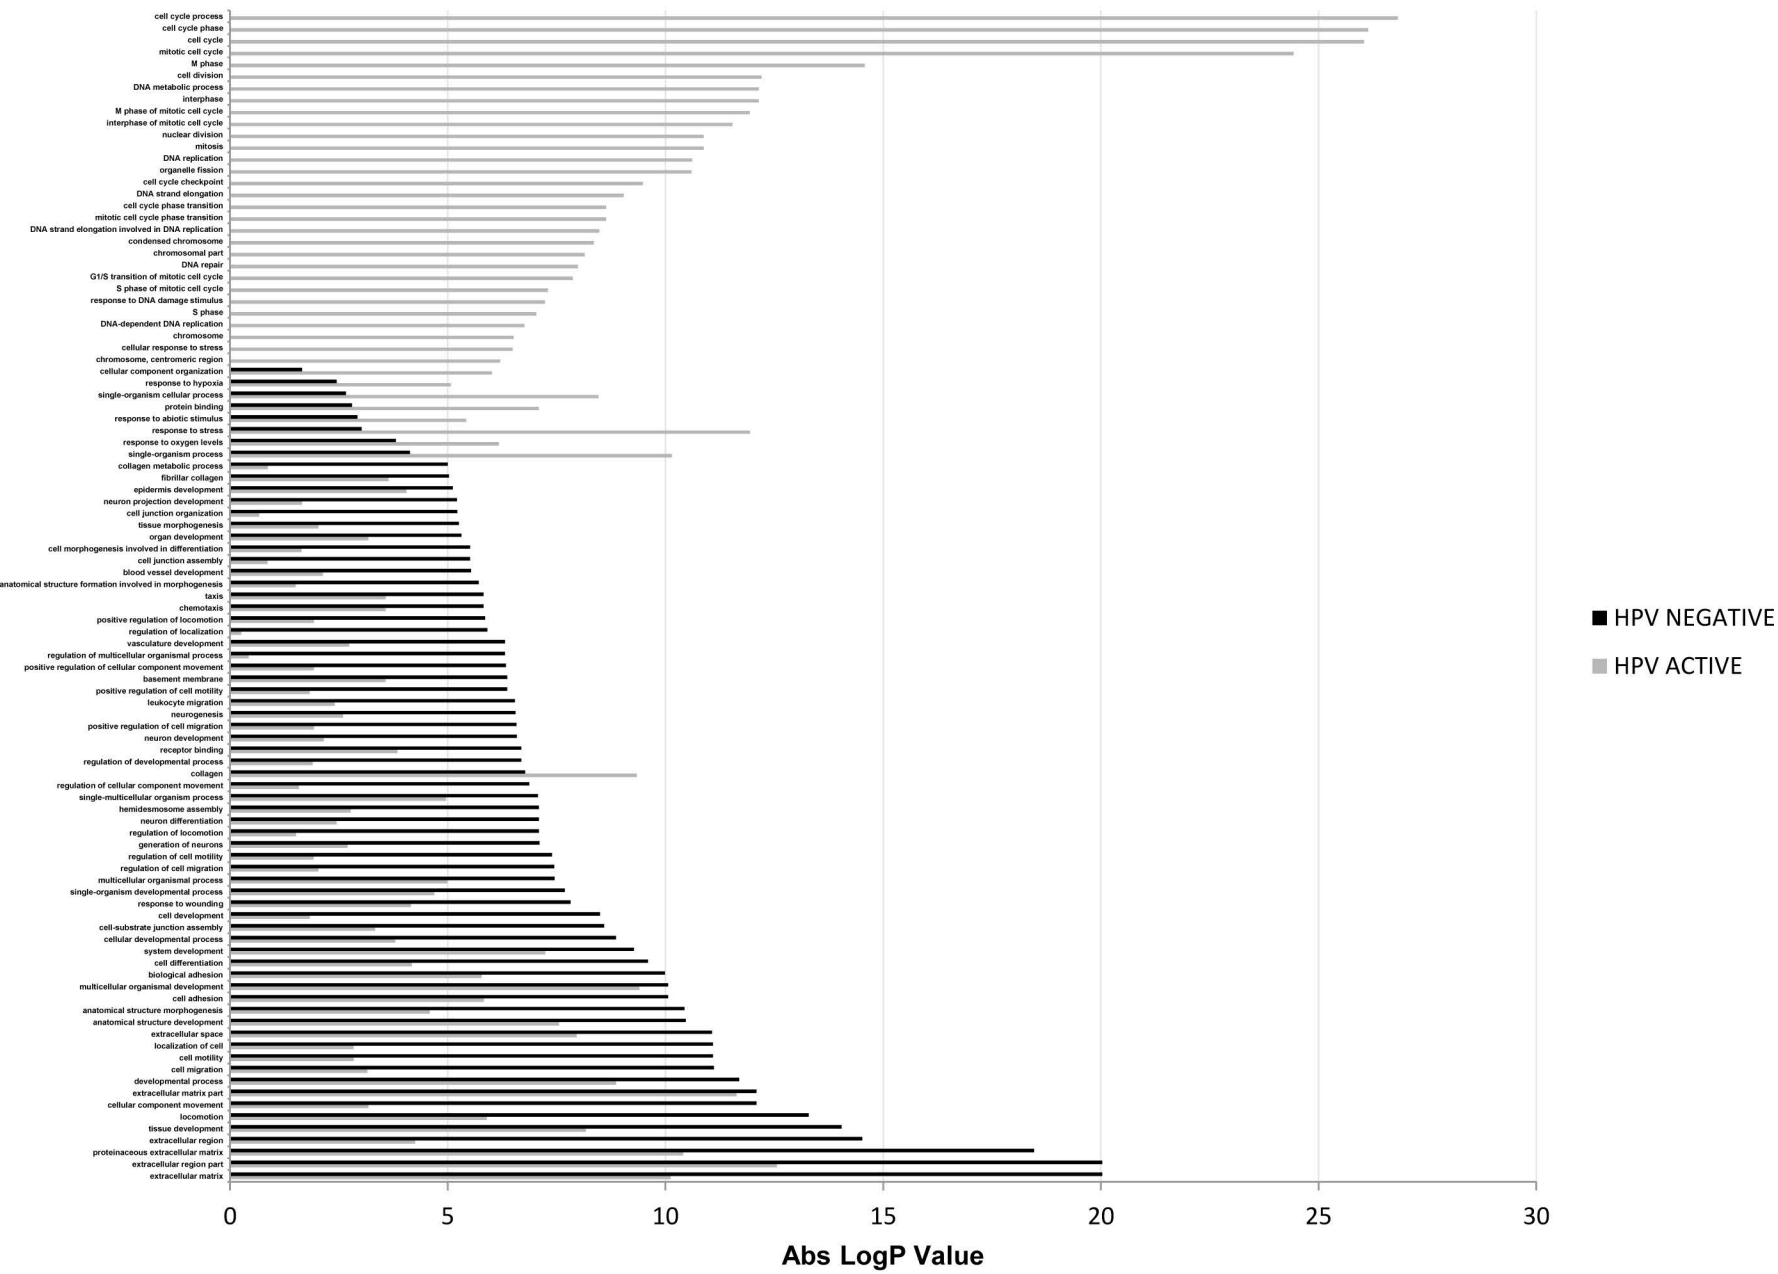

Supplement: NIHMS684410-supplement-Supp_FigureS2-S5.pdf [file NIHMS684410-supplement-Supp_FigureS2-S5.pdf]
