# Supplementary material
Source: PubMed Central journal article supplement (PMC4615317)
Supplement: NIHMS684410-supplement-Supp_TableS1-S9.pdf [file NIHMS684410-supplement-Supp_TableS1-S9.pdf]

**Supporting Information Table 1:** sequences and properties of RT/PCR primers**Target gene-specific primers**

| Gene ID | Refseq ID   | Forward Primer          | Reverse Primer             | Tm (°C) | Amplicon size (bp) | Design Tool                  |
|---------|-------------|-------------------------|----------------------------|---------|--------------------|------------------------------|
| ADAM-12 | NM_003474.4 | AACTAAGTATGTGGAGCTGGTG  | GGTCTGTAAAACCTTGTCACGTCG   | 62.7    | 220                | Real-Time PCR<br>sciTool-IDT |
| BRCA-1  | NM_007298.3 | TATCAGGGTGAAGCAGCATCTGG | TAGAAGGCTGGCTCCCATGC       | 63.4    | 190                | NCBI Primer Blast            |
| CDKN2A  | NM_058197   | GGCACCAGAGGCAGTAACCA    | TCTTTCAATCGGGGATGTCTGAGG   | 63.8    | 70                 | Real-Time PCR<br>sciTool-IDT |
| IGFBP3  | NM_000598.4 | TAGTGAGTCGGAGGAAGACCG   | ACGGCAGGGACCATATTCTGT      | 64.4    | 232                | NCBI Primer Blast            |
| IL-1B   | NM_000576.2 | AACAGATGAAGTGCTCCTTCCA  | GGTGGTCGGAGATTCGTAGC       | 55.5    | 78                 | NCBI Primer Blast            |
| KRT-15  | NM_002275   | AATGTGGAGATGGACGCAG     | TGGATCATTCTGTGTTGGAGG      | 64.4    | 170                | Real-Time PCR<br>sciTool-IDT |
| MAL     | NM_002371   | TCTGTGTTCTGCTTCGTGG     | TTTTCATGGTAGTGCCTGTAGG     | 64.4    | 200                | Real-Time PCR<br>sciTool-IDT |
| MCM-2   | NM_004526.3 | ATCTACGCCAAGGAGAGGGT    | GCTGCCTGTCGCCATAGATT       | 56.1    | 105                | Real-Time PCR<br>sciTool-IDT |
| MET     | NM_000245.2 | GACTCCTACAACCCGAATACTG  | ATAGTGCTCCCAATGAAAGTAG     | 55.5    | 146                | Real-Time PCR<br>sciTool-IDT |
| MMP-10  | NM_002425   | ACAAGAAGGTAAGGGCAGTGA   | GTACTIONTTCTAGGTATTGCTGGGC | 58.7    | 147                | Real-Time PCR<br>sciTool-IDT |
| MMP-13  | NM_002427.3 | AAGATGCGGGGTTCTGATG     | TCGCCATGCTCCTTAATTCCA      | 64.4    | 240                | Real-Time PCR<br>sciTool-IDT |
| MMP-14  | NM_004995.3 | AGCAACTTTATGGGGTGAGT    | GTTCCCGTCACAGATGTTGG       | 64.4    | 128                | Real-Time PCR<br>sciTool-IDT |
| MMP-7   | NM_002423.3 | GGAACAGGCTCAGGACTATCTC  | GCATCTCCTTGAGTTGGCTTC      | 58.7    | 92                 | Real-Time PCR<br>sciTool-IDT |
| NOTCH1  | NM_017617.3 | TCATCAACTCACACGCCGAC    | GTCTCCTCCCTGTTGTTCTGC      | 63.8    | 148                | NCBI Primer Blast            |



| Gene ID | Refseq ID   | Forward Primer          | Reverse Primer            | Tm (°C) | Amplicon size (bp) | Design Tool                  |
|---------|-------------|-------------------------|---------------------------|---------|--------------------|------------------------------|
| SIX-1   | NM_005982.3 | CAAAGGTATGCCAACGAATC    | CCAATGACAGCAATACACCA      | 58.0    | 165                | NCBI Primer Blast            |
| TGFB-2  | NM_003238.3 | AGAGTGCCTGAACAACGGATT   | CCATTCGCCTTCTGCTCTT       | 62.3    | 117                | RTPrimerDB ID :<br>2676      |
| TLR-10  | NM_030956   | GCTTTTGCCACCAACCTGAA    | TCACATCTCCTTTTGATAGCCTTAC | 63.8    | 107                | Real-Time PCR<br>sciTool-IDT |
| TP-53   | NM_000546.4 | TCAACAAGATGTTTTGCCAACTG | ATGTGCTGTGACTGCTGTAGATG   | 64.6    | 118                | RTPrimerDB ID :<br>1186      |

#### Reference gene-specific primers

|        |             |                        |                         |      |     |                              |
|--------|-------------|------------------------|-------------------------|------|-----|------------------------------|
| ATP-5B | NM_001686.3 | TGGTATCAAGGTTGTCGATCTG | GGTATAAATCATTGCCTTCACGG | 63.9 | 188 | Real-Time PCR<br>sciTool-IDT |
| SDHA   | NM_004168.2 | CCCTCCAATTAAACCAAACGC  | GCTGATTTTCCCACAACCTTC   | 57.5 | 178 | Real-Time PCR<br>sciTool-IDT |
| TOP-1  | NM_003286.2 | AGTCCAAAGAGATGAAAGTCCG | TGGGTGTAGATTGATGTGCTC   | 61.4 | 152 | Real-Time PCR<br>sciTool-IDT |

#### HPV-specific primers

| Target     | Forward Primer          | Reverse Primer         | Tm (°C) | Amplicon size (bp) | Reference or design tool |
|------------|-------------------------|------------------------|---------|--------------------|--------------------------|
| HPV16-E7   | CCGGACAGAGCCCATTACAAT   | ACGTGTGTGCTTTGTACGCAC  | 64.5    | 83                 | 49                       |
| HPV35-E6/7 | GGTGGACAGGTCGGTGTATGTC  | GTTGCCTCGGGTTCCAAATC   | 61.5    | 120                | 50                       |
| HPV52-E6/7 | GTTGGACAGGGCGCTGTTC     | CCTCCTCATCTGAGCTGTCACC | 61.5    | 166                | 50                       |
| HPV58-E6/7 | AGGGCGCTGTGCAGTGTGT     | CATCCTCGTCTGAGCTGTCACA | 61.5    | 172                | 50                       |
| HPV66-E7   | GCACCGCAAACGGAAATTGACCT | TGGCCGCTCCAGCAAATGGT   | 55.7    | 96                 | NCBI Primer Blast        |

**Supporting Information Table 2:** Demographic characteristics of study patients and HPV status of tumor samples

| STUDY POPULATION |     | No. of Samples | HPV Negative     |                        | HPV Active     |                       | HPV Inactive     |          | Total HPV Positive | Overall Age of Patients |       |
|------------------|-----|----------------|------------------|------------------------|----------------|-----------------------|------------------|----------|--------------------|-------------------------|-------|
|                  |     |                | n (%)            | Mean Age               | n (%)          | Mean Age              | n (%)            | Mean Age | N (%)              | Mean                    | Range |
| AA               | ALL | 20             | <u>12 (60)</u>   | 57                     | <u>2 (10)</u>  | 39                    | <u>6 (30)</u>    | 65       | <u>8 (40)</u>      | 58                      | 33-83 |
|                  | M   | 11             | 6 (54)           | <b>53<sup>#</sup></b>  | 1 (10)         | 34                    | 4 (36)           | 64       | 5 (45)             | 56                      | 34-79 |
|                  | F   | 9              | 6 (66)           | 61                     | 1 (11)         | 44                    | 2 (22)           | 66       | 3 (33)             | 60                      | 33-83 |
| EA               | ALL | 36             | <u>11 (30.5)</u> | 65                     | <u>14 (39)</u> | 52                    | <u>11 (30.5)</u> | 61       | <u>25 (69.5)</u>   | 59                      | 33-83 |
|                  | M   | 29             | 8 (28)           | <b>71<sup>*#</sup></b> | 14 (48)        | <b>52<sup>*</sup></b> | 7 (24)           | 58       | 21 (72)            | 58                      | 33-83 |
|                  | F   | 7              | 3 (43)           | 65                     | 0              | n/a                   | 4 (57)           | 64       | 4 (57)             | 64                      | 54-72 |
| TOTAL            | ALL | 56             | <u>23 (41)</u>   | 62                     | <u>16 (29)</u> | 43                    | <u>17 (30)</u>   | 63       | <u>33 (59)</u>     | 59                      | 33-83 |
|                  | M   | 40             | 14 (35)          | 62                     | 15 (38)        | 43                    | 11 (27)          | 61       | 26 (65)            | 57                      | 33-83 |
|                  | F   | 16             | 9 (56)           | 63                     | 1 (6.3)        | n/a                   | 6 (37)           | 65       | 7 (44)             | 62                      | 33-83 |

The total number of samples distributed by patients' race and gender is given in the first two columns. This is followed by number of samples with HPV-negative, HPV-active and HPV-inactive status and the overall fraction of samples HPV-positive by DNA. The last column reports the mean age of each group. The r by c chi-square test was conducted to test the degree of independence among the underlined values in the table ( $p=0.03934$ ).

The mean ages of HPV-active, HPV-inactive and HPV-negative patients by race and gender are also shown.

\* The age difference between EA HPV-active males and EA HPV-negative males was statistically significant with  $p = 0.0003$ .

# Among HPV-negative patients, AA men were considerably younger than EA men ( $p = 0.0023$ )

**Supporting Information Table 3** – Demographic characteristics and HPV status of normal tissue samples.

| Age | Race | Gender | Histologic Classification                        | HPV DNA<br>(INNO-LiPA) | HPV<br>Type | Used for<br>Microarray |
|-----|------|--------|--------------------------------------------------|------------------------|-------------|------------------------|
| 49  | EA   | M      | benign uvula                                     | NEG                    |             | Y                      |
| 45  | EA   | M      | benign uvula, tonsil                             | NEG                    |             |                        |
| 31  | EA   | M      | benign uvula, tonsil                             | NEG                    |             |                        |
| 49  | EA   | M      | benign uvula, tonsil                             | NEG                    |             | Y                      |
| 42  | EA   | M      | tonsillitis, tonsil hypertrophy,<br>benign uvula | <b>POS*</b>            | <b>16</b>   |                        |
| 32  | EA   | F      | normal tonsil                                    | NEG                    |             | Y                      |
| 61  | EA   | M      | normal tonsil                                    | NEG                    |             | Y                      |
| 34  | EA   | M      | normal tonsil                                    | NEG                    |             |                        |
| 30  | AA   | F      | benign uvula, normal tonsil                      | NEG                    |             |                        |

(\*) Positive for HPV16 DNA. Could not be tested for HPV activity due to low RIN of RNA.

**Supporting Information Table 4:** HPV type distribution and activity in tumor tissue samples

| <b>Race</b>         | <b>AA</b> |          | <b>EA</b> |          | <b>Total</b> |
|---------------------|-----------|----------|-----------|----------|--------------|
| <b>Gender</b>       | <b>M</b>  | <b>F</b> | <b>M</b>  | <b>F</b> |              |
| HPV16               | 4         | 2        | 19        | 4        | 29           |
| HPV66               | 1         | 1        |           |          | 2            |
| HPV35               |           |          | 1         |          | 1            |
| HPV52, 58           |           |          | 1         |          | 1            |
| HPV X               | 1         |          |           |          | 1            |
| <b>HPV Active</b>   | 1         | 1        | 14        | 0        | 16           |
| <b>HPV Inactive</b> | 4         | 2        | 7         | 4        | 17           |

| Race | Age | Gender | HPV Status | Location                       | AJCC stage | TNM grouping | Smoking                      | Alcohol     | Gross Appearance               | Lymph node features | Basaloid squamous path                           |
|------|-----|--------|------------|--------------------------------|------------|--------------|------------------------------|-------------|--------------------------------|---------------------|--------------------------------------------------|
| AA   | 34  | M      | Active     |                                |            |              | <20 Pack yrs                 | <7 beers/wk |                                |                     | Schneiderian papilloma                           |
| AA   | 62  | M      | Inactive   | Larynx, hypopharynx            | 4a         | T4aN1M0      | 2-Jan                        | No          |                                | necrotic            | mod diff invasive SCC                            |
| AA   | 57  | F      | Inactive   | FOM, buccal                    | 4a         | T4N0M0       | chewing tobacco              | No          |                                |                     | invasive keratinizing SCC well-mod diff          |
| AA   | 75  | F      | Inactive   | Tonsil                         | 2          | T2N0M0       | >20 Pack yrs                 | >7 beers/wk |                                |                     | invasive, mod diff SCC                           |
| AA   | 62  | M      | Inactive   | soft palate                    | 4a         | T4N2cM0      | >20 Pack yrs                 | >7 beers/wk | exophytic                      | cystic              | invasive squamous carcinoma                      |
| AA   | 76  | F      | Negative   | buccal/RMT                     | 4a         | T4N2bM0      | No                           | No          | ulcerative                     | noncystic           | invasive SCC poor-mod diff                       |
| AA   | 83  | F      | Negative   | oral tongue                    | 4a         | T3N2cM0      | No                           | No          | exophytic, ulcerated fungating | cystic              | well diff keratinizing SCC                       |
| AA   | 64  | M      | Negative   | maxillary alveolus/hard palate | 4a         | T4N0M0       | >20 Pack yrs                 | No          |                                |                     | invasive SCC poorly diff                         |
| AA   | 61  | F      | Negative   | supraglottis                   | 4a         | T4N2cM0      | >20 Pack yrs                 | No          | friable                        | noncystic           | invasive keratinizing SCC well diff              |
| AA   | 40  | M      | Negative   | FOM                            | 3          | T3N0M0       | <20 Pack yrs                 | >7 beers/wk | ulcerative                     |                     | mod diff SCC                                     |
| AA   | 55  | M      | Negative   | BOT                            | 4a         | T2N2cM0      | >20 Pack yrs                 | >7 beers/wk |                                | noncystic           | keratinizing SCC, invasive, mod diff             |
| AA   | 47  | M      | Negative   | oral tongue                    | 4a         | T4N1M0       | >20 Pack yrs                 | >7 beers/wk | erosion                        |                     | invasive keratinizing SCC mod diff               |
| AA   | 51  | M      | Negative   | Tonsil, soft palate            | 4a         | T4N2cM0      | <20 Pack yrs to >20 Pack yrs | >7 beers/wk | invasive, exophytic            | noncystic           | invasive mod diff SCC                            |
| EA   | 60  | M      | Active     | BOT                            | 4a         | T2N2cM0      | No                           | No          | "tumor"                        | bilateral cystic    | invasive squamous carcinoma w/ basaloid features |
| EA   | 49  | M      | Active     | Tonsil                         | 1          | T2N0M0       | No                           | No          | nonpapilloma                   | noncystic           | SCC                                              |
| EA   | 60  | M      | Active     | Tonsil                         | 4a         | T1N2aM0      | >20 Pack yrs                 | No          | nonpapilloma                   | cystic, neck mass   | not basaloid squam, P16+, HPV+ in situ           |
| EA   | 46  | M      | Active     | BOT                            | 4a         | T3N2bM0      | >20 Pack yrs                 | No          | mod exophytic                  |                     | invasive SCC w/ basaloid features                |

| Race | Age | Gender | HPV Status | Location     | AJCC stage | TNM grouping | Smoking                       | Alcohol                     | Gross Appearance         | Lymph node features     | Basalosquamous path                                                   |
|------|-----|--------|------------|--------------|------------|--------------|-------------------------------|-----------------------------|--------------------------|-------------------------|-----------------------------------------------------------------------|
| EA   | 49  | M      | Active     | Tonsil       | 4a         | T2N2cM0      | No                            | <7 beers/wk                 | papillomatus, firm       | necrotic                | keratinizing SCC                                                      |
| EA   | 50  | M      | Active     | Tonsil       | 4b         | T1N1M1       | No                            | <7 beers/wk                 | nonpapillomatus          | noncystic               | 1 P16+HPV+                                                            |
| EA   | 54  | M      | Active     | BOT          | 4a         | T2N2bM0      | No, marijuana                 | <7 beers/wk                 | papillomatus             | noncystic               | SCC-rt tonsil, P16+basalosqu                                          |
| EA   | 49  | M      | Active     | Tonsil       | 4a         | T3N2bM0      | >20 Pack yrs                  | >7 beers/wk                 | ulcerative               | cystic                  | SCC                                                                   |
| EA   | 56  | M      | Active     | Tonsil       | 4a         | T1N2aM0      | >20 Pack yrs                  | >7 beers/wk                 | nonpapillomatus          | cystic, neck mass       | P16+ basolosquam                                                      |
| EA   | 61  | M      | Active     | BOT          | 4a         | T3N3M0       | >20 Pack yrs, former          | past hx >7/wk               |                          |                         | HPV neg in situ basoloid squamous aggressive pattern P16+ basolosquam |
| EA   | 33  | M      | Active     | Tonsil       | 4a         | T1N3M0       | No, marijuana & cocaine       | >7 beers/wk, heavy drug use | nonpapillomatus          | noncystic               | P16+ basolosquam                                                      |
| EA   | 69  | F      | Inactive   | oral tongue  | 4a         | T3N2cM0      | >20 Pack yrs                  | No                          | ulcerative               | extracapsular invasion  | mod diff SCC, perineural invasion                                     |
| EA   | 54  | F      | Inactive   | BOT          | 4a         | T4aN2cM0     | No                            | <7 beers/wk                 | ulcerative               |                         | invasive w/ basaloid features                                         |
| EA   | 63  | F      | Inactive   | Tonsil       | 2          | T2N0M0       | >20 Pack yrs                  | <7 beers/wk                 | ulcerative               | noncystic               | invasive, well-mod diff SCC                                           |
| EA   | 68  | F      | Inactive   | oc           | 4a         | rT4N1M0      | >20 Pack yrs                  | >7 beers/wk                 |                          |                         | Invasive keratinizing SCC                                             |
| EA   | 59  | F      | Negative   | left pharynx | 3          | T3N0M0       | <20 Pack yrs                  | No                          | nonpapillomatus          | noncystic               | 2not basolosq, P16neg                                                 |
| EA   | 72  | F      | Negative   | supraglottis | 4a         | T4N2cM0      | >20 Pack yrs                  | <7 beers/wk                 |                          | necrotic                | mod diff SCC                                                          |
| EA   | 66  | M      | Negative   | oral tongue  | 4a         | T2N2cM0      | >20 Pack yrs                  | <7 beers/wk                 | ulcerative               | extracapsular extension | squamous CA w/ focal adenosquamous CA, mod diff                       |
| EA   | 57  | M      | Negative   | oral tongue  | 4a         | T4aN0M0      | <20 Pack yrs, chewing tobacco | <7 beers/wk                 | lg exophytic, ulcerative |                         | invasive mod diff SCC                                                 |
| EA   | 62  | M      | Negative   | oral cavity  | 2          | T2N0M0       | >20 Pack yrs                  | >7 beers/wk                 | ulcerative               |                         | basaloid SCC                                                          |



| Race | Age | Gender | HPV Status | Location    | AJCC stage | TNM grouping | Smoking         | Alcohol       | Gross Appearance         | Lymph node features | Basal squamous path                  |
|------|-----|--------|------------|-------------|------------|--------------|-----------------|---------------|--------------------------|---------------------|--------------------------------------|
| EA   | 64  | M      | Negative   | oral tongue | 4b         | T2N3M0       | chewing tobacco | >7 beers/wk   | leukoplakia w/ erosion   | N/A                 | Invasive keratinizing SCC, well-diff |
| EA   | 72  | M      | Negative   | oral Lip    | 3          | T4N0M0       | >20 Pack yrs    | past hx >7/wk | nonpapilloma, ulcerative | N/A                 | invasive SCC                         |
| EA   | 68  | M      | Negative   | FOM         | 4a         | T4aN1M0      | >20 Pack yrs    | past hx >7/wk | erosive, ulcerative      | noncystic           | invasive keratinizing SCC mod diff   |

Table S6: List of DEGs, HPV-active vs HPV-inactive, FC 2.

| GeneSymbol | GeneName                                                            | Genbank Accession | HPV Active vs HPV Inactive |            |
|------------|---------------------------------------------------------------------|-------------------|----------------------------|------------|
|            |                                                                     |                   | FC (abs)                   | Regulation |
| ACBD7      | acyl-CoA binding domain containing 7                                | NM_001039844      | 4.3                        | up         |
| ACPL2      | acid phosphatase-like 2                                             | NM_152282         | 2.4                        | up         |
| ACSS1      | acyl-CoA synthetase short-chain family member 1                     | NM_032501         | 2.7                        | up         |
| ACTR3C     | ARP3 actin-related protein 3 homolog C (yeast)                      | BX640643          | 2.3                        | up         |
| ADAM1      | ADAM metalloproteinase domain 1, pseudogene                         | NR_036636         | 2.6                        | up         |
| ADARB2     | adenosine deaminase, RNA-specific, B2                               | NM_018702         | 4.2                        | up         |
| ADCY6      | adenylate cyclase 6                                                 | NM_015270         | 2.2                        | up         |
| AHDC1      | AT hook, DNA binding motif, containing 1                            | NM_001029882      | 2.0                        | up         |
| AIG1       | androgen-induced 1                                                  | NM_016108         | 2.5                        | down       |
| AMY1C      | amylase, alpha 1C (salivary)                                        | NM_001008219      | 6.4                        | up         |
| ANKRD43    | ankyrin repeat domain 43                                            | NM_175873         | 4.6                        | up         |
| APOBEC3C   | apolipoprotein B mRNA editing enzyme, catalytic polypeptide-like 3C | NM_014508         | 2.7                        | up         |
| APOBEC3F   | apolipoprotein B mRNA editing enzyme, catalytic polypeptide-like 3F | NM_145298         | 2.6                        | up         |
| ARF3       | ADP-ribosylation factor 3                                           |                   | 4.2                        | up         |
| ARHGAP26   | Rho GTPase activating protein 26                                    | NM_015071         | 3.3                        | up         |
| ARHGAP33   | Rho GTPase activating protein 33                                    | NM_052948         | 2.6                        | up         |
| ARHGEF19   | Rho guanine nucleotide exchange factor (GEF) 19                     | NM_153213         | 3.4                        | up         |
| ARL4D      | ADP-ribosylation factor-like 4D                                     | NM_001661         | 3.7                        | down       |
| ARNT2      | aryl-hydrocarbon receptor nuclear translocator 2                    | NM_014862         | 5.7                        | up         |
| ATP8B3     | ATPase, aminophospholipid transporter, class I, type 8B, member 3   | NM_138813         | 13.8                       | down       |
| BARD1      | BRCA1 associated RING domain 1                                      | NM_000465         | 2.2                        | up         |
| BCL11A     | B-cell CLL/lymphoma 11A (zinc finger protein)                       | NM_018014         | 2.7                        | up         |
| BCL11A     | B-cell CLL/lymphoma 11A (zinc finger protein)                       | NM_022893         | 2.5                        | up         |
| BK250D10.8 | uncharacterized LOC339674                                           | NR_024355         | 3.6                        | up         |
| BRCA2      | breast cancer 2, early onset                                        | NM_000059         | 2.4                        | up         |
| BRI3       | brain protein I3                                                    | NM_001159491      | 2.0                        | down       |
| BTNL9      | butyrophilin-like 9                                                 | NM_152547         | 6.3                        | up         |
| BZRAP1     | benzodiazapine receptor (peripheral) associated protein 1           | NM_004758         | 2.4                        | up         |
| C11orf71   | chromosome 11 open reading frame 71                                 | NM_019021         | 2.2                        | down       |
| C11orf85   | chromosome 11 open reading frame 85                                 | NM_001037225      | 3.8                        | up         |
| C11orf92   | chromosome 11 open reading frame 92                                 | NR_034154         | 29.0                       | up         |
| C11orf93   | chromosome 11 open reading frame 93                                 | NM_001136105      | 5.0                        | up         |
| C14orf149  | chromosome 14 open reading frame 149                                | NM_144581         | 2.0                        | down       |
| C14orf33   | chromosome 14 open reading frame 33                                 | NR_027123         | 3.3                        | down       |

|           |                                                                     |              |      |      |
|-----------|---------------------------------------------------------------------|--------------|------|------|
| C16orf57  | chromosome 16 open reading frame 57                                 | NM_001204911 | 2.0  | down |
| C19orf25  | chromosome 19 open reading frame 25                                 | NM_152482    | 2.1  | up   |
| C19orf57  | chromosome 19 open reading frame 57                                 | NM_024323    | 8.0  | up   |
| C1D       | C1D nuclear receptor corepressor                                    | NM_006333    | 2.3  | down |
| C1orf213  | chromosome 1 open reading frame 213                                 | NR_033690    | 3.7  | up   |
| C1orf63   | chromosome 1 open reading frame 63                                  | NM_020317    | 2.0  | up   |
| C21orf71  | chromosome 21 open reading frame 71                                 | NR_024092    | 3.2  | up   |
| C2CD4D    | C2 calcium-dependent domain containing 4D                           | NM_001136003 | 2.6  | up   |
| C2orf15   | chromosome 2 open reading frame 15                                  | NM_144706    | 4.5  | up   |
| C2orf55   | chromosome 2 open reading frame 55                                  | NM_207362    | 6.7  | up   |
| C3orf67   | chromosome 3 open reading frame 67                                  | NM_198463    | 6.6  | down |
| C4orf46   | chromosome 4 open reading frame 46                                  | NM_001008393 | 2.1  | up   |
| C4orf7    | chromosome 4 open reading frame 7                                   | NM_152997    | 57.4 | up   |
| C5        | complement component 5                                              | NM_001735    | 3.5  | up   |
| C5orf30   | chromosome 5 open reading frame 30                                  | NM_033211    | 2.3  | up   |
| C7orf13   | chromosome 7 open reading frame 13                                  | NR_026865    | 8.6  | up   |
| C8G       | complement component 8, gamma polypeptide                           | NM_000606    | 8.4  | up   |
| CA12      | carbonic anhydrase XII                                              | NM_001218    | 2.3  | down |
| CARD6     | caspase recruitment domain family, member 6                         | NM_032587    | 3.0  | down |
| CASP2     | caspase 2, apoptosis-related cysteine peptidase                     | NM_032982    | 2.0  | up   |
| CATSPER2  | cation channel, sperm associated 2                                  | NM_172097    | 3.7  | up   |
| CBS       | cystathionine-beta-synthase                                         | NM_000071    | 6.8  | up   |
| CBX5      | chromobox homolog 5                                                 | NM_001127322 | 2.4  | up   |
| CBX7      | chromobox homolog 7                                                 | NM_175709    | 2.3  | up   |
| CCDC14    | coiled-coil domain containing 14                                    | NM_022757    | 2.3  | up   |
| CCDC146   | coiled-coil domain containing 146                                   | NM_020879    | 3.1  | up   |
| CCDC93    | coiled-coil domain containing 93                                    | NM_019044    | 2.1  | up   |
| CD36      | CD36 molecule (thrombospondin receptor)                             | NM_001001547 | 12.3 | down |
| CDC42EP4  | CDC42 effector protein (Rho GTPase binding) 4                       | NM_012121    | 3.7  | up   |
| CDC7      | cell division cycle 7 homolog (S. cerevisiae)                       | NM_003503    | 2.3  | up   |
| CDCA7     | cell division cycle associated 7                                    | NM_031942    | 2.6  | up   |
| CDK6      | cyclin-dependent kinase 6                                           | NM_001259    | 2.0  | down |
| CDKN2A    | cyclin-dependent kinase inhibitor 2A (melanoma, p16, inhibits CDK4) | NM_000077    | 31.1 | up   |
| CDKN2A    | cyclin-dependent kinase inhibitor 2A (melanoma, p16, inhibits CDK4) | NM_058197    | 12.9 | up   |
| CDKN2B-AS | CDKN2B antisense RNA (non-protein coding)                           | NR_003529    | 4.5  | up   |
| CDKN2C    | cyclin-dependent kinase inhibitor 2C (p18, inhibits CDK4)           | NM_078626    | 3.4  | up   |
| CELF4     | CUGBP, Elav-like family member 4                                    | NM_020180    | 4.6  | up   |
| CENPJ     | centromere protein J                                                | NM_018451    | 2.5  | up   |
| CENPK     | centromere protein K                                                | NM_022145    | 3.0  | up   |
| CEP152    | centrosomal protein 152kDa                                          | NM_014985    | 2.3  | up   |
| CHADL     | chondroadherin-like                                                 | NM_138481    | 2.0  | up   |

|          |                                                                                       |              |      |      |
|----------|---------------------------------------------------------------------------------------|--------------|------|------|
| CHAF1A   | chromatin assembly factor 1, subunit A (p150)                                         | NM_005483    | 2.1  | up   |
| CHAF1B   | chromatin assembly factor 1, subunit B (p60)                                          | NM_005441    | 2.3  | up   |
| CHDH     | choline dehydrogenase                                                                 | NM_018397    | 2.6  | up   |
| CHPT1    | choline phosphotransferase 1                                                          | NM_020244    | 3.1  | up   |
| CIDEB    | cell death-inducing DFFA-like effector b                                              | NM_014430    | 2.4  | up   |
| CIT      | citron (rho-interacting, serine/threonine kinase 21)                                  | NM_007174    | 2.8  | up   |
| CLCF1    | cardiotrophin-like cytokine factor 1                                                  | NM_013246    | 2.0  | down |
| CLDN10   | claudin 10                                                                            | NM_182848    | 70.0 | up   |
| CLGN     | calmegin                                                                              | NM_004362    | 11.5 | up   |
| CUL9     | cullin 9                                                                              | NM_015089    | 2.4  | up   |
| CYP4X1   | cytochrome P450, family 4, subfamily X, polypeptide 1                                 | NM_178033    | 12.1 | up   |
| CYP4Z1   | cytochrome P450, family 4, subfamily Z, polypeptide 1                                 | NM_178134    | 7.5  | up   |
| DAAM1    | dishevelled associated activator of morphogenesis 1                                   | NM_014992    | 2.0  | down |
| DCUN1D5  | DCN1, defective in cullin neddylation 1, domain containing 5 ( <i>S. cerevisiae</i> ) | NM_032299    | 2.0  | down |
| DDX11    | DEAD/H (Asp-Glu-Ala-Asp/His) box polypeptide 11                                       | NM_030653    | 2.7  | up   |
| DHFR     | dihydrofolate reductase                                                               | NM_000791    | 2.7  | up   |
| DOT1L    | DOT1-like, histone H3 methyltransferase ( <i>S. cerevisiae</i> )                      | NM_032482    | 2.2  | up   |
| DSCR6    | Down syndrome critical region gene 6                                                  | NM_018962    | 5.1  | up   |
| DTX2     | deltex homolog 2 ( <i>Drosophila</i> )                                                | NM_020892    | 2.6  | up   |
| EGOT     | eosinophil granule ontogeny transcript (non-protein coding)                           | NR_004428    | 4.4  | up   |
| ETV6     | ets variant 6                                                                         | NM_001987    | 2.2  | up   |
| EXOC3L4  | exocyst complex component 3-like 4                                                    | NM_001077594 | 4.5  | up   |
| EZH2     | enhancer of zeste homolog 2 ( <i>Drosophila</i> )                                     | NM_004456    | 2.0  | up   |
| F2RL1    | coagulation factor II (thrombin) receptor-like 1                                      | NM_005242    | 7.4  | down |
| FAM111B  | family with sequence similarity 111, member B                                         | NM_198947    | 2.4  | up   |
| FAM126A  | family with sequence similarity 126, member A                                         | NM_032581    | 2.2  | down |
| FAM3B    | family with sequence similarity 3, member B                                           | NM_058186    | 18.0 | up   |
| FAM89A   | family with sequence similarity 89, member A                                          | NM_198552    | 3.3  | down |
| FANCC    | Fanconi anemia, complementation group C                                               | NM_000136    | 2.4  | up   |
| FANCL    | Fanconi anemia, complementation group L                                               | NM_001114636 | 2.5  | up   |
| FANCL    | Fanconi anemia, complementation group L                                               | NM_018062    | 2.4  | up   |
| FAR1     | fatty acyl CoA reductase 1                                                            | NM_032228    | 2.3  | up   |
| FBXO43   | F-box protein 43                                                                      | NM_001029860 | 3.6  | up   |
| FLJ22447 | uncharacterized LOC400221                                                             | NR_039985    | 4.0  | down |
| FLJ41200 | uncharacterized LOC401492                                                             | NR_033863    | 5.0  | down |
| FLJ45482 | uncharacterized LOC645566                                                             | AK127393     | 7.0  | up   |
| FOXD3    | forkhead box D3                                                                       | NM_012183    | 6.7  | up   |
| FOXRED2  | FAD-dependent oxidoreductase domain containing 2                                      | NM_024955    | 2.6  | up   |

|          |                                                                                                |              |      |      |
|----------|------------------------------------------------------------------------------------------------|--------------|------|------|
| FRMD4A   | FERM domain containing 4A                                                                      | AK001072     | 2.8  | up   |
| GABRP    | gamma-aminobutyric acid (GABA) A receptor, pi                                                  | NM_014211    | 43.0 | up   |
| GAD1     | glutamate decarboxylase 1 (brain, 67kDa)                                                       | NM_000817    | 10.9 | up   |
| GALNT1   | UDP-N-acetyl-alpha-D-galactosamine:polypeptide N-acetylgalactosaminyltransferase 1 (GalNAc-T1) | NM_020474    | 2.0  | down |
| GLB1L2   | galactosidase, beta 1-like 2                                                                   | NM_138342    | 3.4  | up   |
| GLS2     | glutaminase 2 (liver, mitochondrial)                                                           | NM_013267    | 10.4 | up   |
| GOLGA7B  | golgin A7 family, member B                                                                     | NM_001010917 | 5.4  | down |
| GOLT1A   | golgi transport 1A                                                                             | NM_198447    | 6.4  | up   |
| GPC2     | glypican 2                                                                                     | NM_152742    | 3.0  | up   |
| GPR137   | G protein-coupled receptor 137                                                                 | NM_020155    | 2.1  | up   |
| GRAMD4   | GRAM domain containing 4                                                                       | NM_015124    | 2.0  | up   |
| GRIN2C   | glutamate receptor, ionotropic, N-methyl D-aspartate 2C                                        | NM_000835    | 7.9  | up   |
| GUCY2GP  | guanylate cyclase 2G homolog (mouse), pseudogene                                               | NR_028134    | 2.2  | down |
| GUSBP1   | glucuronidase, beta pseudogene 1                                                               | NR_027028    | 2.3  | up   |
| HAUS5    | HAUS augmin-like complex, subunit 5                                                            | NM_015302    | 2.4  | up   |
| HIF1A    | hypoxia inducible factor 1, alpha subunit (basic helix-loop-helix transcription factor)        | NM_181054    | 2.0  | down |
| HOXB13   | homeobox B13                                                                                   | NM_006361    | 23.6 | up   |
| HTR7     | 5-hydroxytryptamine (serotonin) receptor 7 (adenylate cyclase-coupled)                         | NM_019859    | 2.9  | down |
| ICOSLG   | inducible T-cell co-stimulator ligand                                                          |              | 3.2  | up   |
| IGSF9    | immunoglobulin superfamily, member 9                                                           | NM_020789    | 3.3  | up   |
| IKBKE    | inhibitor of kappa light polypeptide gene enhancer in B-cells, kinase epsilon                  | NM_014002    | 2.5  | up   |
| IL17RB   | interleukin 17 receptor B                                                                      | NM_018725    | 9.0  | up   |
| INPP1    | inositol polyphosphate-1-phosphatase                                                           | NM_002194    | 3.0  | up   |
| IRX6     | iroquois homeobox 6                                                                            | NM_024335    | 5.9  | up   |
| KATNAL2  | katanin p60 subunit A-like 2                                                                   | NM_031303    | 4.0  | up   |
| KCNA2    | potassium voltage-gated channel, shaker-related subfamily, member 2                            | NM_001204269 | 10.8 | up   |
| KCNB2    | potassium voltage-gated channel, Shab-related subfamily, member 2                              | NM_004770    | 10.1 | up   |
| KCNJ14   | potassium inwardly-rectifying channel, subfamily J, member 14                                  | NM_170720    | 2.9  | up   |
| KCNS1    | potassium voltage-gated channel, delayed-rectifier, subfamily S, member 1                      | NM_002251    | 97.9 | up   |
| KDM5D    | lysine (K)-specific demethylase 5D                                                             | NM_004653    | 11.8 | up   |
| KEL      | Kell blood group, metallo-endopeptidase                                                        | NM_000420    | 9.7  | up   |
| KIAA0368 | KIAA0368                                                                                       | NM_001080398 | 3.3  | up   |
| KIAA1147 | KIAA1147                                                                                       | NM_001080392 | 2.6  | up   |
| KIAA1328 | KIAA1328                                                                                       | NM_020776    | 2.1  | up   |
| KIF24    | kinesin family member 24                                                                       | NM_194313    | 3.0  | up   |
| KIF25    | kinesin family member 25                                                                       | NM_030615    | 10.2 | up   |

|              |                                                                     |              |      |      |
|--------------|---------------------------------------------------------------------|--------------|------|------|
| KITLG        | KIT ligand                                                          | NM_000899    | 2.1  | up   |
| KLHL35       | kelch-like 35 (Drosophila)                                          | NM_001039548 | 10.9 | up   |
| KNTC1        | kinetochore associated 1                                            | NM_014708    | 2.9  | up   |
| KREMEN1      | kringle containing transmembrane protein 1                          | NM_001039570 | 3.3  | up   |
| KRT19P2      | keratin 19 pseudogene 2                                             | NR_036685    | 84.6 | up   |
| LDB3         | LIM domain binding 3                                                | NM_001171610 | 2.4  | down |
| LDHC         | lactate dehydrogenase C                                             | NM_002301    | 6.0  | up   |
| LEAP2        | liver expressed antimicrobial peptide 2                             | NM_052971    | 3.3  | up   |
| LIG1         | ligase I, DNA, ATP-dependent                                        | NM_000234    | 2.7  | up   |
| LMO4         | LIM domain only 4                                                   | NM_006769    | 5.0  | up   |
| LOC100127891 | uncharacterized LOC100127891                                        | XR_108812    | 2.4  | down |
| LOC100128191 | uncharacterized LOC100128191                                        | NR_027157    | 2.2  | up   |
| LOC100129534 | small nuclear ribonucleoprotein polypeptide N pseudogene            | NR_024489    | 2.6  | up   |
| LOC100131654 | uncharacterized LOC100131654                                        | AK124891     | 2.3  | down |
| LOC100132832 | PMS2 postmeiotic segregation increased 2 (S. cerevisiae) pseudogene | NR_028058    | 5.2  | up   |
| LOC100133050 | glucuronidase, beta pseudogene                                      | NR_027503    | 2.2  | up   |
| LOC100170939 | glucuronidase, beta pseudogene                                      | NR_024054    | 2.1  | up   |
| LOC100272216 | uncharacterized LOC100272216                                        | NR_027439    | 2.6  | up   |
| LOC100288637 | OTU domain containing 7A pseudogene                                 | NR_038253    | 3.6  | up   |
| LOC100505729 | uncharacterized LOC100505729                                        | XR_108524    | 2.3  | up   |
| LOC100505882 |                                                                     | XR_110336    | 2.6  | down |
| LOC100506003 |                                                                     | XR_109785    | 7.5  | up   |
| LOC100506123 | uncharacterized LOC100506123                                        | NR_040097    | 6.1  | up   |
| LOC100506503 | uncharacterized LOC100506503                                        | XR_109701    | 2.9  | up   |
| LOC100506538 | uncharacterized LOC100506538                                        | XR_108868    | 3.5  | up   |
| LOC100506783 | uncharacterized LOC100506783                                        | NR_038435    | 4.0  | up   |
| LOC100506860 |                                                                     | XR_108813    | 13.5 | down |
| LOC100506895 | uncharacterized LOC100506895                                        | NR_038276    | 2.0  | down |
| LOC100506994 | uncharacterized LOC100506994                                        | NR_038281    | 3.9  | down |
| LOC100507094 | uncharacterized LOC100507094                                        | XR_109558    | 8.9  | up   |
| LOC100507127 | uncharacterized LOC100507127                                        | NR_038291    | 3.7  | up   |
| LOC100507161 | putative uncharacterized protein NCRNA00269-like                    | XM_003118878 | 3.1  | down |
| LOC100507421 | transmembrane protein 178-like                                      | NM_001195278 | 2.5  | up   |
| LOC100509075 | uncharacterized LOC100509075                                        | XR_111772    | 7.9  | up   |
| LOC100509121 |                                                                     | XM_003120334 | 4.2  | up   |
| LOC100509263 | uncharacterized LOC100509263                                        | XM_003403443 | 40.7 | up   |
| LOC100652912 | uncharacterized LOC100652912                                        | XR_132665    | 2.5  | up   |
| LOC219731    | uncharacterized LOC219731                                           | NR_038222    | 2.2  | up   |
| LOC254559    | uncharacterized LOC254559                                           | NR_015411    | 3.2  | up   |
| LOC255177    | uncharacterized LOC255177                                           | BC031230     | 5.4  | up   |
| LOC283174    | uncharacterized LOC283174                                           | NR_024344    | 2.2  | down |

|           |                                                                           |              |      |      |
|-----------|---------------------------------------------------------------------------|--------------|------|------|
| LOC283485 | uncharacterized LOC283485                                                 | AK093862     | 7.1  | up   |
| LOC284630 | uncharacterized LOC284630                                                 | AK096384     | 13.8 | up   |
| LOC285084 | uncharacterized LOC285084                                                 | NR_038897    | 6.2  | up   |
| LOC286161 | uncharacterized LOC286161                                                 | AK091672     | 33.9 | up   |
| LOC375196 | uncharacterized LOC375196                                                 | NR_028386    | 2.1  | up   |
| LOC389831 | uncharacterized LOC389831                                                 | NM_001242480 | 17.7 | up   |
| LOC401109 | uncharacterized LOC401109                                                 | NR_034088    | 4.7  | up   |
| LOC401431 | uncharacterized LOC401431                                                 | NR_027040    | 4.8  | up   |
| LOC440792 | proline dehydrogenase (oxidase) 1 pseudogene                              | AB051440     | 2.7  | up   |
| LOC441268 | uncharacterized LOC441268                                                 | AK125166     | 4.2  | up   |
| LOC541473 | FK506 binding protein 6, 36kDa pseudogene                                 | NR_003602    | 2.9  | up   |
| LOC642366 | uncharacterized LOC642366                                                 | XR_108597    | 14.8 | up   |
| LOC728537 | uncharacterized LOC728537                                                 | NR_038386    | 6.2  | up   |
| LOC728715 | ovostatin homolog 2-like                                                  | XM_003119524 | 3.0  | up   |
| LOC729732 | uncharacterized LOC729732                                                 | XR_132886    | 5.0  | up   |
| LOC729887 | uncharacterized LOC729887                                                 | BC052334     | 2.6  | up   |
| LOC84856  | uncharacterized LOC84856                                                  | NR_026827    | 2.3  | down |
| LRR56     | leucine rich repeat containing 56                                         | NM_198075    | 3.3  | up   |
| LRR8B     | leucine rich repeat containing 8 family, member B                         | NM_015350    | 3.2  | up   |
| LY75      | lymphocyte antigen 75                                                     | NM_002349    | 2.1  | up   |
| MAGEA6    | melanoma antigen family A, 6                                              | NM_175868    | 5.1  | up   |
| MAGI3     | membrane associated guanylate kinase, WW and PDZ domain containing 3      | NM_152900    | 3.6  | down |
| MAMDC4    | MAM domain containing 4                                                   | NM_206920    | 2.4  | up   |
| MAP1LC3B  | microtubule-associated protein 1 light chain 3 beta                       | NM_022818    | 3.3  | up   |
| MAP3K14   | mitogen-activated protein kinase kinase kinase 14                         | NM_003954    | 2.0  | down |
| MAP3K6    | mitogen-activated protein kinase kinase kinase 6                          | NM_004672    | 2.6  | up   |
| MAP7D2    | MAP7 domain containing 2                                                  | NM_152780    | 2.6  | up   |
| MARVELD2  | MARVEL domain containing 2                                                | AK055094     | 10.7 | up   |
| MCF2L     | MCF.2 cell line derived transforming sequence-like                        | NM_024979    | 2.5  | up   |
| MCM2      | minichromosome maintenance complex component 2                            | NM_004526    | 3.4  | up   |
| MCM3      | minichromosome maintenance complex component 3                            | NM_002388    | 3.4  | up   |
| MCM5      | minichromosome maintenance complex component 5                            | NM_006739    | 2.2  | up   |
| MCM8      | minichromosome maintenance complex component 8                            | NM_182802    | 2.2  | up   |
| MDM2      | Mdm2 p53 binding protein homolog (mouse)                                  | NM_002392    | 2.6  | up   |
| MEI1      | meiosis inhibitor 1                                                       | NM_152513    | 2.4  | up   |
| MEIS1     | Meis homeobox 1                                                           | NM_002398    | 6.6  | up   |
| MGAT3     | mannosyl (beta-1,4)-glycoprotein beta-1,4-N-acetylglucosaminyltransferase | NM_002409    | 2.5  | up   |
| MICALL2   | MICAL-like 2                                                              | NM_182924    | 8.3  | up   |

|            |                                                                               |              |      |      |
|------------|-------------------------------------------------------------------------------|--------------|------|------|
| MLF1IP     | MLF1 interacting protein                                                      | NM_024629    | 2.8  | up   |
| MMAA       | methylmalonic aciduria (cobalamin deficiency) cblA type                       | NM_172250    | 2.6  | up   |
| MPP2       | membrane protein, palmitoylated 2 (MAGUK p55 subfamily member 2)              | NM_005374    | 2.1  | up   |
| MPPED1     | metallophosphoesterase domain containing 1                                    | NM_001044370 | 7.2  | up   |
| MSH2       | mutS homolog 2, colon cancer, nonpolyposis type 1 (E. coli)                   | NM_000251    | 4.1  | down |
| MSX2P1     | msh homeobox 2 pseudogene 1                                                   | NR_002307    | 2.1  | up   |
| MTHFD1L    | methylenetetrahydrofolate dehydrogenase (NADP+ dependent) 1-like              | NM_015440    | 4.7  | down |
| MXD3       | MAX dimerization protein 3                                                    | NM_001142935 | 2.0  | down |
| MYB        | v-myb myeloblastosis viral oncogene homolog (avian)                           | NM_005375    | 3.1  | up   |
| MYCN       | v-myc myelocytomatosis viral related oncogene, neuroblastoma derived (avian)  | NM_005378    | 5.0  | up   |
| MYO3A      | myosin IIIA                                                                   | NM_017433    | 5.5  | up   |
| MYO5A      | myosin VA (heavy chain 12, myosin)                                            | NM_000259    | 10.7 | up   |
| NCRNA00185 | non-protein coding RNA 185                                                    | NR_001544    | 2.8  | down |
| NDST2      | N-deacetylase/N-sulfotransferase (heparan glucosaminyl) 2                     | BC018681     | 29.2 | up   |
| NEDD1      | neural precursor cell expressed, developmentally down-regulated 1             | NM_152905    | 2.6  | down |
| NEURL1B    | neuralized homolog 1B (Drosophila)                                            | NM_001142651 | 3.1  | up   |
| NEURL3     | neuralized homolog 3 (Drosophila) pseudogene                                  | NR_026875    | 2.9  | up   |
| NINJ1      | ninjurin 1                                                                    | NM_004148    | 13.0 | up   |
| NOTCH1     | notch 1                                                                       | NM_017617    | 3.0  | up   |
| NT5E       | 5'-nucleotidase, ecto (CD73)                                                  | NM_002526    | 4.4  | up   |
| NUP62      | nucleoporin 62kDa                                                             | NM_153719    | 3.0  | down |
| OXER1      | oxoeicosanoid (OXE) receptor 1                                                | NM_148962    | 2.0  | up   |
| P01115     |                                                                               |              | 2.9  | up   |
| PAFAH1B3   | platelet-activating factor acetylhydrolase 1b, catalytic subunit 3 (29kDa)    | NM_002573    | 3.9  | down |
| PARD6B     | par-6 partitioning defective 6 homolog beta (C. elegans)                      | NM_032521    | 2.3  | up   |
| PAX1       | paired box 1                                                                  | NM_006192    | 2.8  | up   |
| PBX1       | pre-B-cell leukemia homeobox 1                                                | NM_002585    | 69.1 | up   |
| PBX4       | pre-B-cell leukemia homeobox 4                                                | NM_025245    | 2.0  | up   |
| PCLO       | piccolo (presynaptic cytomatrix protein)                                      | NM_014510    | 3.9  | up   |
| PCNA       | proliferating cell nuclear antigen                                            | NM_002592    | 3.8  | up   |
| PCP2       | Purkinje cell protein 2                                                       | NM_174895    | 2.5  | up   |
| PD XK      | pyridoxal (pyridoxine, vitamin B6) kinase                                     | NM_003681    | 2.3  | up   |
| PER3       | period homolog 3 (Drosophila)                                                 | NM_016831    | 2.9  | up   |
| PIDD       | p53-induced death domain protein                                              | NM_145886    | 5.2  | up   |
| PLB1       | phospholipase B1                                                              | BC065041     | 2.1  | up   |
| PLEKHG4    | pleckstrin homology domain containing, family G (with RhoGef domain) member 4 | NM_015432    | 2.7  | down |



|          |                                                                      |              |      |      |
|----------|----------------------------------------------------------------------|--------------|------|------|
| PLGLB1   | plasminogen-like B1                                                  | NM_001032392 | 3.3  | up   |
| PLXNA1   | plexin A1                                                            | NM_032242    | 2.9  | up   |
| PMS2L2   | postmeiotic segregation increased 2-like 2 pseudogene                | BC010535     | 3.0  | up   |
| PODXL2   | podocalyxin-like 2                                                   | NM_015720    | 2.3  | up   |
| POLA1    | polymerase (DNA directed), alpha 1, catalytic subunit                | NM_016937    | 5.4  | up   |
| POLA2    | polymerase (DNA directed), alpha 2 (70kD subunit)                    | NM_002689    | 2.1  | up   |
| POLD1    | polymerase (DNA directed), delta 1, catalytic subunit 125kDa         | NM_002691    | 2.0  | up   |
| POLE     | polymerase (DNA directed), epsilon                                   | NM_006231    | 2.2  | up   |
| POLH     | polymerase (DNA directed), eta                                       | NM_006502    | 2.4  | up   |
| POU4F1   | POU class 4 homeobox 1                                               | NM_006237    | 2.8  | up   |
| PP12719  | uncharacterized LOC100653022                                         | XM_003403527 | 6.2  | up   |
| PPAPDC3  | phosphatidic acid phosphatase type 2 domain containing 3             |              | 3.2  | up   |
| PPARGC1B | peroxisome proliferator-activated receptor gamma, coactivator 1 beta | NM_133263    | 3.3  | down |
| PPFIBP2  | PTPRF interacting protein, binding protein 2 (liprin beta 2)         | NM_003621    | 3.2  | up   |
| PRELID2  | PRELI domain containing 2                                            | NM_138492    | 3.0  | up   |
| PRIMA1   | proline rich membrane anchor 1                                       | NM_178013    | 2.9  | up   |
| PRINS    | psoriasis associated RNA induced by stress (non-protein coding)      | NR_023388    | 6.4  | up   |
| PROCR    | protein C receptor, endothelial                                      | NM_006404    | 3.9  | up   |
| PRODH    | proline dehydrogenase (oxidase) 1                                    | NM_016335    | 2.3  | down |
| PSIP1    | PC4 and SFRS1 interacting protein 1                                  | NM_033222    | 4.6  | up   |
| PTCD2    | pentatricopeptide repeat domain 2                                    | NM_024754    | 2.1  | up   |
| PTHLH    | parathyroid hormone-like hormone                                     | NM_198965    | 2.0  | up   |
| PTN      | pleiotrophin                                                         | NM_002825    | 5.4  | down |
| PTPRF    | protein tyrosine phosphatase, receptor type, F                       | NM_002840    | 7.8  | up   |
| RALGPS1  | Ral GEF with PH domain and SH3 binding motif 1                       | NM_014636    | 3.0  | up   |
| RANBP17  | RAN binding protein 17                                               | NM_022897    | 5.9  | up   |
| RBBP9    | retinoblastoma binding protein 9                                     | NM_006606    | 11.0 | up   |
| RBM14    | RNA binding motif protein 14                                         | NM_006328    | 2.2  | up   |
| REM1     | RAS (RAD and GEM)-like GTP-binding 1                                 | NM_014012    | 4.4  | up   |
| RGNEF    | 190 kDa guanine nucleotide exchange factor                           | NM_001177693 | 6.5  | up   |
| RGS20    | regulator of G-protein signaling 20                                  | NM_170587    | 4.4  | up   |
| RHBDL3   | rhomboid, veinlet-like 3 (Drosophila)                                | NM_138328    | 2.8  | down |
| RHOXF1   | Rhox homeobox family, member 1                                       | NM_139282    | 8.9  | up   |
| RIBC2    | RIB43A domain with coiled-coils 2                                    | NM_015653    | 4.5  | up   |
| RNF150   | ring finger protein 150                                              | NM_020724    | 19.1 | up   |
| RNF165   | ring finger protein 165                                              | NM_152470    | 4.7  | up   |
| RNF207   | ring finger protein 207                                              | NM_207396    | 7.7  | up   |
| RNF212   | ring finger protein 212                                              | NM_001131034 | 4.6  | up   |

|          |                                                                                                                  |              |      |      |
|----------|------------------------------------------------------------------------------------------------------------------|--------------|------|------|
| RNF32    | ring finger protein 32                                                                                           | NM_030936    | 14.6 | up   |
| RNF43    | ring finger protein 43                                                                                           | NM_017763    | 6.3  | up   |
| RNPC3    | RNA-binding region (RNP1, RRM) containing 3                                                                      | AK289844     | 3.0  | up   |
| RPA2     | replication protein A2, 32kDa                                                                                    | NM_002946    | 2.1  | up   |
| RPL3L    | ribosomal protein L3-like                                                                                        | NM_005061    | 2.5  | up   |
| RTKN2    | rhotekin 2                                                                                                       | NM_145307    | 2.6  | down |
| RTP3     | receptor (chemosensory) transporter protein 3                                                                    | NM_031440    | 3.7  | up   |
| SAP18    | Sin3A-associated protein, 18kDa                                                                                  | NM_005870    | 50.7 | up   |
| SAP30    | Sin3A-associated protein, 30kDa                                                                                  | NM_003864    | 2.1  | up   |
| SAP30L   | SAP30-like                                                                                                       | NM_024632    | 2.2  | up   |
| SCAI     | suppressor of cancer cell invasion                                                                               | NM_173690    | 2.1  | up   |
| SEMA4C   | sema domain, immunoglobulin domain (Ig), transmembrane domain (TM) and short cytoplasmic domain, (semaphorin) 4C | NM_017789    | 2.6  | up   |
| SESN3    | sestrin 3                                                                                                        | NM_144665    | 2.5  | up   |
| SIM2     | single-minded homolog 2 (Drosophila)                                                                             | NM_005069    | 3.1  | down |
| SLC16A8  | solute carrier family 16, member 8 (monocarboxylic acid transporter 3)                                           | NM_013356    | 10.0 | up   |
| SLC1A1   | solute carrier family 1 (neuronal/epithelial high affinity glutamate transporter, system Xag), member 1          | NM_004170    | 6.0  | up   |
| SLC25A23 | solute carrier family 25 (mitochondrial carrier; phosphate carrier), member 23                                   | NM_024103    | 4.4  | up   |
| SLC35E2  | solute carrier family 35, member E2                                                                              | NM_182838    | 2.6  | up   |
| SLC37A2  | solute carrier family 37 (glycerol-3-phosphate transporter), member 2                                            | NM_198277    | 2.8  | up   |
| SLC6A17  | solute carrier family 6, member 17                                                                               | NM_001010898 | 2.6  | down |
| SLC7A5   | solute carrier family 7 (amino acid transporter light chain, L system), member 5                                 | NM_003486    | 2.2  | down |
| SLC7A8   | solute carrier family 7 (amino acid transporter light chain, L system), member 8                                 | NM_182728    | 2.1  | down |
| SLC9A8   | solute carrier family 9 (sodium/hydrogen exchanger), member 8                                                    | NM_015266    | 3.8  | down |
| SMA4     | glucuronidase, beta pseudogene                                                                                   | NR_029426    | 2.2  | up   |
| SMARCA2  | SWI/SNF related, matrix associated, actin dependent regulator of chromatin, subfamily a, member 2                | NM_139045    | 2.4  | up   |
| SMC1B    | structural maintenance of chromosomes 1B                                                                         | NM_148674    | 2.7  | up   |
| SMG9     | smg-9 homolog, nonsense mediated mRNA decay factor (C. elegans)                                                  | NM_019108    | 94.6 | up   |
| SMPDL3B  | sphingomyelin phosphodiesterase, acid-like 3B                                                                    | NM_001009568 | 2.1  | up   |
| SNORA11  | small nucleolar RNA, H/ACA box 11                                                                                | NR_002953    | 5.2  | up   |
| SNORA17  | small nucleolar RNA, H/ACA box 17                                                                                | NR_002958    | 2.4  | down |
| SNORA43  | small nucleolar RNA, H/ACA box 43                                                                                | NR_002975    | 2.2  | down |
| SNORA71A | small nucleolar RNA, H/ACA box 71A                                                                               | NR_002911    | 2.2  | down |
| SNORD65  | small nucleolar RNA, C/D box 65                                                                                  | NR_003054    | 2.0  | down |
| SNORD93  | small nucleolar RNA, C/D box 93                                                                                  | NR_003075    | 2.5  | down |

|          |                                                                 |              |      |      |
|----------|-----------------------------------------------------------------|--------------|------|------|
| SP9      | Sp9 transcription factor homolog (mouse)                        |              | 3.7  | down |
| SPATA5   | spermatogenesis associated 5                                    | NM_145207    | 10.0 | up   |
| SPIB     | Spi-B transcription factor (Spi-1/PU.1 related)                 | NM_003121    | 3.2  | up   |
| SPRR4    | small proline-rich protein 4                                    | NM_173080    | 9.1  | up   |
| SRGAP3   | SLIT-ROBO Rho GTPase activating protein 3                       | NM_014850    | 4.8  | down |
| SSX2IP   | synovial sarcoma, X breakpoint 2 interacting protein            | NM_014021    | 4.9  | up   |
| STAG3    | stromal antigen 3                                               | NM_012447    | 2.2  | up   |
| STAR     | steroidogenic acute regulatory protein                          | NM_000349    | 10.8 | up   |
| SUSD4    | sushi domain containing 4                                       | NM_017982    | 5.6  | up   |
| SV2B     | synaptic vesicle glycoprotein 2B                                | NM_014848    | 7.6  | up   |
| SYCE2    | synaptonemal complex central element protein 2                  | NM_001105578 | 6.1  | up   |
| SYCP2    | synaptonemal complex protein 2                                  | NM_014258    | 11.4 | up   |
| SYNGR3   | synaptogyrin 3                                                  | NM_004209    | 23.5 | up   |
| SYNPO2   | synaptopodin 2                                                  | NM_133477    | 4.3  | up   |
| TCAM1P   | testicular cell adhesion molecule 1 homolog (mouse), pseudogene | NR_002947    | 8.6  | up   |
| TCP11    | t-complex 11 homolog (mouse)                                    | NM_018679    | 17.8 | up   |
| TCTEX1D4 | Tctex1 domain containing 4                                      | NM_001013632 | 5.3  | up   |
| TCTN2    | tectonic family member 2                                        | NM_024809    | 2.2  | down |
| THBS1    | thrombospondin 1                                                | NM_003246    | 3.3  | up   |
| TIMELESS | timeless homolog (Drosophila)                                   | NM_003920    | 3.0  | down |
| TLR5     | toll-like receptor 5                                            | NM_003268    | 2.6  | up   |
| TLX2     | T-cell leukemia homeobox 2                                      | NM_016170    | 2.6  | up   |
| TLX3     | T-cell leukemia homeobox 3                                      | NM_021025    | 4.2  | up   |
| TM7SF3   | transmembrane 7 superfamily member 3                            | NM_016551    | 14.8 | up   |
| TMCO4    | transmembrane and coiled-coil domains 4                         | NM_181719    | 2.6  | up   |
| TMCO7    | transmembrane and coiled-coil domains 7                         | NM_024562    | 2.5  | up   |
| TMEM194A | transmembrane protein 194A                                      | NM_015257    | 2.0  | down |
| TMSB4Y   | thymosin beta 4, Y-linked                                       | NM_004202    | 2.8  | up   |
| TNFAIP2  | tumor necrosis factor, alpha-induced protein 2                  | NM_006291    | 4.1  | up   |
| TPD52    | tumor protein D52                                               | NM_001025252 | 4.0  | up   |
| TRIM50   | tripartite motif containing 50                                  | NM_178125    | 2.6  | up   |
| TROAP    | trophinin associated protein (tastin)                           | NM_005480    | 5.0  | up   |
| TSC2     | tuberous sclerosis 2                                            | NM_000548    | 2.7  | up   |
| TTC7B    | tetratricopeptide repeat domain 7B                              | NM_001010854 | 2.5  | up   |
| TTC9C    | tetratricopeptide repeat domain 9C                              | AF289605     | 2.9  | down |
| TTY14    | testis-specific transcript, Y-linked 14 (non-protein coding)    | NR_001543    | 4.1  | up   |
| TTY15    | testis-specific transcript, Y-linked 15 (non-protein coding)    | NR_001545    | 3.2  | up   |
| TXLNG2P  | taxilin gamma 2, pseudogene                                     | NR_045128    | 15.9 | up   |
| TXLNG2P  | taxilin gamma 2, pseudogene                                     | NR_045129    | 23.3 | up   |
| TYK2     | tyrosine kinase 2                                               | NM_003331    | 22.8 | up   |

|             |                                                                    |              |      |      |
|-------------|--------------------------------------------------------------------|--------------|------|------|
| TYMS        | thymidylate synthetase                                             | NM_001071    | 2.0  | up   |
| UBE2Q2      | ubiquitin-conjugating enzyme E2Q family member 2                   | NM_173469    | 2.8  | up   |
| UPB1        | ureidopropionase, beta                                             | NM_016327    | 2.6  | down |
| URB1        | URB1 ribosome biogenesis 1 homolog (S. cerevisiae)                 | NM_014825    | 6.7  | up   |
| UTY         | ubiquitously transcribed tetratricopeptide repeat gene, Y-linked   | NM_182660    | 2.0  | up   |
| VCAM1       | vascular cell adhesion molecule 1                                  | NM_001078    | 13.4 | up   |
| VMAC        | vimentin-type intermediate filament associated coiled-coil protein | NM_001017921 | 6.3  | up   |
| WDR34       | WD repeat domain 34                                                | NM_052844    | 2.0  | down |
| WEE1        | WEE1 homolog (S. pombe)                                            | NM_003390    | 2.2  | up   |
| WHSC1       | Wolf-Hirschhorn syndrome candidate 1                               | NM_133330    | 2.2  | up   |
| WIPF3       | WAS/WASL interacting protein family, member 3                      | AK094250     | 2.8  | up   |
| WNK2        | WNK lysine deficient protein kinase 2                              | NM_006648    | 3.6  | up   |
| WRAP73      | WD repeat containing, antisense to TP73                            | NM_017818    | 6.0  | up   |
| XIST        | X (inactive)-specific transcript (non-protein coding)              | NR_001564    | 2.1  | up   |
| XKR4        | XK, Kell blood group complex subunit-related family, member 4      | NM_052898    | 3.3  | down |
| XLOC_000190 |                                                                    |              | 9.0  | up   |
| XLOC_000363 |                                                                    |              | 3.0  | up   |
| XLOC_000441 |                                                                    | AK023394     | 4.1  | up   |
| XLOC_000778 |                                                                    |              | 3.1  | up   |
| XLOC_000956 |                                                                    | BX089534     | 3.2  | down |
| XLOC_001286 |                                                                    |              | 4.6  | up   |
| XLOC_001784 |                                                                    |              | 2.4  | up   |
| XLOC_002484 |                                                                    | AK307257     | 2.3  | down |
| XLOC_002779 |                                                                    | BC035247     | 2.1  | down |
| XLOC_003422 |                                                                    |              | 3.4  | up   |
| XLOC_005935 |                                                                    | CB123670     | 2.1  | down |
| XLOC_006915 |                                                                    | DA998032     | 4.0  | down |
| XLOC_007857 |                                                                    |              | 2.4  | down |
| XLOC_008323 |                                                                    |              | 2.1  | down |
| XLOC_008700 |                                                                    |              | 7.7  | up   |
| XLOC_009507 |                                                                    | AK054718     | 3.9  | down |
| XLOC_011545 |                                                                    |              | 4.8  | up   |
| XLOC_011546 |                                                                    |              | 4.6  | up   |
| XLOC_012079 |                                                                    |              | 4.7  | up   |
| XLOC_012452 |                                                                    | BC084573     | 4.2  | up   |
| XLOC_012895 |                                                                    |              | 2.3  | down |
| XLOC_013093 |                                                                    |              | 3.9  | up   |
| XLOC_013364 |                                                                    |              | 2.2  | down |
| XLOC_013541 |                                                                    | BX116929     | 2.6  | down |

|                |                                                                        |              |      |      |
|----------------|------------------------------------------------------------------------|--------------|------|------|
| XLOC_013981    |                                                                        | BX105611     | 2.8  | down |
| XLOC_014111    |                                                                        | DB312214     | 2.8  | up   |
| XLOC_014257    |                                                                        |              | 5.6  | up   |
| XLOC_014288    |                                                                        |              | 6.9  | up   |
| XLOC_014388    |                                                                        | XR_109724    | 3.1  | up   |
| XLOC_I2_000101 |                                                                        |              | 6.8  | up   |
| XLOC_I2_003293 |                                                                        | XM_001715897 | 3.6  | up   |
| XLOC_I2_006152 |                                                                        |              | 3.7  | up   |
| XLOC_I2_006595 |                                                                        |              | 2.1  | down |
| XLOC_I2_006745 |                                                                        |              | 2.6  | up   |
| XLOC_I2_007119 |                                                                        |              | 2.1  | down |
| XLOC_I2_008151 |                                                                        |              | 2.5  | up   |
| XLOC_I2_008991 |                                                                        |              | 2.9  | up   |
| XLOC_I2_009273 |                                                                        | AK127572     | 3.8  | up   |
| XLOC_I2_009301 |                                                                        |              | 4.9  | up   |
| XLOC_I2_009316 |                                                                        |              | 4.6  | up   |
| XLOC_I2_009668 |                                                                        |              | 4.7  | up   |
| XLOC_I2_009888 |                                                                        |              | 2.0  | down |
| XLOC_I2_010141 |                                                                        | DA697996     | 4.0  | down |
| XLOC_I2_010239 |                                                                        |              | 2.1  | down |
| XLOC_I2_011011 |                                                                        | BC036795     | 2.5  | up   |
| XLOC_I2_011649 |                                                                        |              | 2.7  | up   |
| XLOC_I2_013124 |                                                                        | AJ606328     | 6.8  | down |
| XLOC_I2_013293 |                                                                        | BQ441651     | 2.9  | down |
| XLOC_I2_013485 |                                                                        |              | 2.7  | up   |
| XLOC_I2_015892 |                                                                        |              | 5.8  | up   |
| XLOC_I2_015907 |                                                                        |              | 3.0  | down |
| XPNPEP3        | X-prolyl aminopeptidase (aminopeptidase P) 3, putative                 | NM_001204827 | 2.4  | down |
| XRCC1          | X-ray repair complementing defective repair in Chinese hamster cells 1 | NM_006297    | 2.2  | up   |
| YBX2           | Y box binding protein 2                                                | NM_015982    | 10.3 | up   |
| ZADH2          | zinc binding alcohol dehydrogenase domain containing 2                 | NM_175907    | 2.2  | up   |
| ZBTB5          | zinc finger and BTB domain containing 5                                | NM_014872    | 2.0  | up   |
| ZCWPW1         | zinc finger, CW type with PWWP domain 1                                | NM_017984    | 2.4  | up   |
| ZDHHC23        | zinc finger, DHHC-type containing 23                                   | NM_173570    | 3.5  | up   |
| ZFH2           | zinc finger homeobox 2                                                 | NM_033400    | 3.1  | up   |
| ZFP14          | zinc finger protein 14 homolog (mouse)                                 | NM_020917    | 3.0  | up   |
| ZFP3           | zinc finger protein 3 homolog (mouse)                                  | NM_153018    | 2.1  | up   |
| ZMIZ2          | zinc finger, MIZ-type containing 2                                     | NM_031449    | 2.5  | up   |
| ZNF346         | zinc finger protein 346                                                | NM_012279    | 3.6  | up   |
| ZNF512         | zinc finger protein 512                                                | NM_032434    | 2.2  | up   |
| ZNF541         | zinc finger protein 541                                                | NM_001101419 | 24.6 | up   |

|        |                               |              |      |    |
|--------|-------------------------------|--------------|------|----|
| ZNF641 | zinc finger protein 641       | NM_152320    | 2.1  | up |
| ZNF827 | zinc finger protein 827       | NM_178835    | 4.2  | up |
| ZYG11A | zyg-11 homolog A (C. elegans) | NM_001004339 | 24.7 | up |

Table S7: List of DEGs, HPV-active vs HPV-negative, FC 2.

| GeneSymbol | GeneName                                                                                      | Genbank Accession | HPV Active vs HPV Negative |            |
|------------|-----------------------------------------------------------------------------------------------|-------------------|----------------------------|------------|
|            |                                                                                               |                   | FC (abs)                   | Regulation |
| ABL2       | v-abl Abelson murine leukemia viral oncogene homolog 2                                        | NM_007314         | 2.7                        | down       |
| ACBD7      | acyl-CoA binding domain containing 7                                                          | NM_001039844      | 3.8                        | up         |
| ACPL2      | acid phosphatase-like 2                                                                       | NM_152282         | 2.7                        | up         |
| ACSS1      | acyl-CoA synthetase short-chain family member 1                                               | NM_032501         | 3.4                        | up         |
| ACTN3      | actinin, alpha 3                                                                              | NM_001104         | 2.6                        | down       |
| ACTR3C     | ARP3 actin-related protein 3 homolog C (yeast)                                                | BX640643          | 2.1                        | up         |
| ADAM1      | ADAM metallopeptidase domain 1, pseudogene                                                    | NR_036636         | 2.5                        | up         |
| ADARB2     | adenosine deaminase, RNA-specific, B2                                                         | NM_018702         | 4.6                        | up         |
| ADCY6      | adenylate cyclase 6                                                                           | NM_015270         | 2.5                        | up         |
| AGPAT4     | 1-acylglycerol-3-phosphate O-acyltransferase 4 (lysophosphatidic acid acyltransferase, delta) | NM_020133         | 4.1                        | down       |
| AHDC1      | AT hook, DNA binding motif, containing 1                                                      | NM_001029882      | 2.0                        | up         |
| AIG1       | androgen-induced 1                                                                            |                   | 2.8                        | down       |
| AMY1C      | amylase, alpha 1C (salivary)                                                                  | NM_001008219      | 6.9                        | up         |
| ANKRD43    | ankyrin repeat domain 43                                                                      | NM_175873         | 9.6                        | up         |
| AP4S1      | adaptor-related protein complex 4, sigma 1 subunit                                            | NM_001128126      | 2.6                        | down       |
| APOBEC3C   | apolipoprotein B mRNA editing enzyme, catalytic polypeptide-like 3C                           | NM_014508         | 2.3                        | up         |
| APOBEC3F   | apolipoprotein B mRNA editing enzyme, catalytic polypeptide-like 3F                           | NM_145298         | 2.6                        | up         |
| ARF3       | ADP-ribosylation factor 3                                                                     |                   | 2.8                        | up         |
| ARHGAP26   | Rho GTPase activating protein 26                                                              | NM_015071         | 3.4                        | up         |
| ARHGAP33   | Rho GTPase activating protein 33                                                              | NM_052948         | 2.5                        | up         |
| ARHGAP4    | Rho GTPase activating protein 4                                                               | NM_001164741      | 3.6                        | up         |
| ARHGEF19   | Rho guanine nucleotide exchange factor (GEF) 19                                               | NM_153213         | 2.8                        | up         |
| ARL4D      | ADP-ribosylation factor-like 4D                                                               | NM_001661         | 4.1                        | down       |
| ARNT2      | aryl-hydrocarbon receptor nuclear translocator 2                                              | NM_014862         | 7.5                        | up         |
| ATP8B3     | ATPase, aminophospholipid transporter, class I, type 8B, member 3                             | NM_138813         | 4.6                        | down       |
| BARD1      | BRCA1 associated RING domain 1                                                                | NM_000465         | 2.0                        | up         |
| BBS5       | Bardet-Biedl syndrome 5                                                                       | NM_152384         | 2.2                        | down       |
| BCL11A     | B-cell CLL/lymphoma 11A (zinc finger protein)                                                 | NM_018014         | 2.8                        | up         |
| BCL11A     | B-cell CLL/lymphoma 11A (zinc finger protein)                                                 | NM_022893         | 3.6                        | up         |
| BK250D10.8 | uncharacterized LOC339674                                                                     | NR_024355         | 4.5                        | up         |
| BRCA2      | breast cancer 2, early onset                                                                  | NM_000059         | 2.1                        | up         |
| BRI3       | brain protein I3                                                                              | NM_001159491      | 2.8                        | down       |
| BTNL9      | butyrophilin-like 9                                                                           | NM_152547         | 14.7                       | up         |

|           |                                                           |              |       |      |
|-----------|-----------------------------------------------------------|--------------|-------|------|
| BZRAP1    | benzodiazapine receptor (peripheral) associated protein 1 | NM_004758    | 4.4   | up   |
| BZW1      | basic leucine zipper and W2 domains 1                     | NM_001207068 | 2.3   | down |
| C11orf85  | chromosome 11 open reading frame 85                       | NM_001037225 | 3.7   | up   |
| C11orf92  | chromosome 11 open reading frame 92                       | NR_034154    | 43.0  | up   |
| C11orf93  | chromosome 11 open reading frame 93                       | NM_001136105 | 8.9   | up   |
| C13orf16  | chromosome 13 open reading frame 16                       | NM_152324    | 3.4   | down |
| C14orf109 | chromosome 14 open reading frame 109                      | NM_001098621 | 2.2   | down |
| C14orf126 | chromosome 14 open reading frame 126                      | NM_080664    | 2.2   | down |
| C14orf149 | chromosome 14 open reading frame 149                      | NM_144581    | 3.1   | down |
| C14orf33  | chromosome 14 open reading frame 33                       | NR_027123    | 4.7   | down |
| C16orf57  | chromosome 16 open reading frame 57                       | NM_001204911 | 3.2   | down |
| C19orf25  | chromosome 19 open reading frame 25                       | NM_152482    | 2.2   | up   |
| C19orf57  | chromosome 19 open reading frame 57                       | NM_024323    | 7.7   | up   |
| C1D       | C1D nuclear receptor corepressor                          | NM_006333    | 2.1   | down |
| C1orf213  | chromosome 1 open reading frame 213                       | NR_033690    | 2.5   | up   |
| C1orf63   | chromosome 1 open reading frame 63                        | NM_020317    | 2.1   | up   |
| C21orf71  | chromosome 21 open reading frame 71                       | NR_024092    | 3.2   | up   |
| C2CD4D    | C2 calcium-dependent domain containing 4D                 | NM_001136003 | 2.3   | up   |
| C2orf15   | chromosome 2 open reading frame 15                        | NM_144706    | 2.8   | up   |
| C2orf55   | chromosome 2 open reading frame 55                        | NM_207362    | 5.1   | up   |
| C3orf67   | chromosome 3 open reading frame 67                        | NM_198463    | 7.6   | down |
| C4orf7    | chromosome 4 open reading frame 7                         | NM_152997    | 131.4 | up   |
| C5        | complement component 5                                    | NM_001735    | 4.5   | up   |
| C5orf25   | chromosome 5 open reading frame 25                        | AK299336     | 2.2   | up   |
| C7orf13   | chromosome 7 open reading frame 13                        | NR_026865    | 2.5   | up   |
| C8G       | complement component 8, gamma polypeptide                 | NM_000606    | 9.6   | up   |
| CA12      | carbonic anhydrase XII                                    | NM_001218    | 4.8   | down |
| CAB39     | calcium binding protein 39                                | NM_001130849 | 2.2   | down |
| CAP1      | CAP, adenylate cyclase-associated protein 1 (yeast)       | NM_006367    | 2.1   | down |
| CARD6     | caspase recruitment domain family, member 6               | NM_032587    | 2.6   | down |
| CASP2     | caspase 2, apoptosis-related cysteine peptidase           | NM_032982    | 2.1   | up   |
| CATSPER2  | cation channel, sperm associated 2                        | NM_172097    | 2.4   | up   |
| CBS       | cystathionine-beta-synthase                               | NM_000071    | 4.9   | up   |
| CBX5      | chromobox homolog 5                                       | NM_001127322 | 3.0   | up   |
| CBX7      | chromobox homolog 7                                       | NM_175709    | 3.3   | up   |
| CCDC14    | coiled-coil domain containing 14                          | NM_022757    | 2.3   | up   |
| CCDC146   | coiled-coil domain containing 146                         | NM_020879    | 2.3   | up   |
| CDC42EP4  | CDC42 effector protein (Rho GTPase binding) 4             | NM_012121    | 2.9   | up   |
| CDC7      | cell division cycle 7 homolog (S. cerevisiae)             | NM_003503    | 2.2   | up   |
| CDCA7     | cell division cycle associated 7                          | NM_031942    | 2.1   | up   |
| CDK6      | cyclin-dependent kinase 6                                 | NM_001259    | 3.0   | down |
| CDKN2A    | cyclin-dependent kinase inhibitor 2A (melanoma,           | NM_000077    | 24.4  | up   |



|           |                                                                              |              |      |      |
|-----------|------------------------------------------------------------------------------|--------------|------|------|
|           | p16, inhibits CDK4)                                                          |              |      |      |
| CDKN2A    | cyclin-dependent kinase inhibitor 2A (melanoma, p16, inhibits CDK4)          | NM_058197    | 13.1 | up   |
| CDKN2B-AS | CDKN2B antisense RNA (non-protein coding)                                    | NR_003529    | 4.4  | up   |
| CDKN2C    | cyclin-dependent kinase inhibitor 2C (p18, inhibits CDK4)                    | NM_078626    | 5.1  | up   |
| CELF4     | CUGBP, Elav-like family member 4                                             | NM_020180    | 11.4 | up   |
| CENPJ     | centromere protein J                                                         | NM_018451    | 2.4  | up   |
| CENPK     | centromere protein K                                                         | NM_022145    | 2.3  | up   |
| CENPM     | centromere protein M                                                         | NM_024053    | 2.4  | up   |
| CHADL     | chondroadherin-like                                                          | NM_138481    | 3.4  | up   |
| CHAF1A    | chromatin assembly factor 1, subunit A (p150)                                | NM_005483    | 2.3  | up   |
| CHAF1B    | chromatin assembly factor 1, subunit B (p60)                                 | NM_005441    | 2.6  | up   |
| CHDH      | choline dehydrogenase                                                        | NM_018397    | 2.9  | up   |
| CHPT1     | choline phosphotransferase 1                                                 | NM_020244    | 3.5  | up   |
| CIDEB     | cell death-inducing DFFA-like effector b                                     | NM_014430    | 2.0  | up   |
| CIT       | citron (rho-interacting, serine/threonine kinase 21)                         | NM_007174    | 2.6  | up   |
| CLCF1     | cardiotrophin-like cytokine factor 1                                         | NM_013246    | 3.2  | down |
| CLDN10    | claudin 10                                                                   | NM_182848    | 38.4 | up   |
| CLGN      | calmegin                                                                     | NM_004362    | 8.8  | up   |
| CLIC4     | chloride intracellular channel 4                                             | NM_013943    | 2.2  | down |
| CLIP4     | CAP-GLY domain containing linker protein family, member 4                    | NM_024692    | 2.6  | down |
| CLK4      | CDC-like kinase 4                                                            | NM_020666    | 2.1  | up   |
| CNST      | consortin, connexin sorting protein                                          | NM_001139459 | 2.1  | down |
| CREB3L4   | cAMP responsive element binding protein 3-like 4                             | NM_130898    | 2.2  | up   |
| CUL9      | cullin 9                                                                     | NM_015089    | 2.6  | up   |
| CYP4X1    | cytochrome P450, family 4, subfamily X, polypeptide 1                        | NM_178033    | 11.8 | up   |
| CYP4Z1    | cytochrome P450, family 4, subfamily Z, polypeptide 1                        | NM_178134    | 6.2  | up   |
| DAAM1     | dishevelled associated activator of morphogenesis 1                          | NM_014992    | 3.3  | down |
| DAAM2     | dishevelled associated activator of morphogenesis 2                          | BC078153     | 2.2  | down |
| DCUN1D3   | DCN1, defective in cullin neddylation 1, domain containing 3 (S. cerevisiae) | NM_173475    | 2.0  | down |
| DCUN1D5   | DCN1, defective in cullin neddylation 1, domain containing 5 (S. cerevisiae) | NM_032299    | 2.8  | down |
| DDX11     | DEAD/H (Asp-Glu-Ala-Asp/His) box polypeptide 11                              | NM_030653    | 2.2  | up   |
| DHFR      | dihydrofolate reductase                                                      | NM_000791    | 2.8  | up   |
| DSCR6     | Down syndrome critical region gene 6                                         | NM_018962    | 6.6  | up   |
| DTX2      | deltex homolog 2 (Drosophila)                                                | NM_020892    | 2.0  | up   |
| ECHDC1    | enoyl CoA hydratase domain containing 1                                      | NM_018479    | 2.1  | down |
| EGOT      | eosinophil granule ontogeny transcript (non-protein coding)                  | NR_004428    | 4.2  | up   |
| ETNK1     | ethanolamine kinase 1                                                        | NM_001039481 | 2.5  | down |
| ETV6      | ets variant 6                                                                | NM_001987    | 2.3  | up   |

|          |                                                                                         |              |      |      |
|----------|-----------------------------------------------------------------------------------------|--------------|------|------|
| EXOC3L4  | exocyst complex component 3-like 4                                                      | NM_001077594 | 9.1  | up   |
| EXOC6B   | exocyst complex component 6B                                                            | NM_015189    | 2.9  | down |
| EZH1     | enhancer of zeste homolog 1 (Drosophila)                                                | NM_001991    | 3.1  | up   |
| EZH2     | enhancer of zeste homolog 2 (Drosophila)                                                | NM_004456    | 2.3  | up   |
| F2RL1    | coagulation factor II (thrombin) receptor-like 1                                        | NM_005242    | 10.7 | down |
| FAM111B  | family with sequence similarity 111, member B                                           | NM_198947    | 2.8  | up   |
| FAM126A  | family with sequence similarity 126, member A                                           | NM_032581    | 2.5  | down |
| FAM3B    | family with sequence similarity 3, member B                                             | NM_058186    | 17.9 | up   |
| FAM89A   | family with sequence similarity 89, member A                                            | NM_198552    | 3.3  | down |
| FAM91A1  | family with sequence similarity 91, member A1                                           | NM_144963    | 2.5  | down |
| FANCC    | Fanconi anemia, complementation group C                                                 | NM_000136    | 2.8  | up   |
| FANCL    | Fanconi anemia, complementation group L                                                 | NM_001114636 | 2.2  | up   |
| FANCL    | Fanconi anemia, complementation group L                                                 | NM_018062    | 2.4  | up   |
| FBXO3    | F-box protein 3                                                                         | NM_033406    | 2.0  | down |
| FBXO43   | F-box protein 43                                                                        | NM_001029860 | 3.9  | up   |
| FICD     | FIC domain containing                                                                   | NM_007076    | 2.4  | up   |
| FLJ22447 | uncharacterized LOC400221                                                               | NR_039985    | 6.0  | down |
| FLJ41200 | uncharacterized LOC401492                                                               | NR_033863    | 4.2  | down |
| FLJ45482 | uncharacterized LOC645566                                                               | AK127393     | 5.0  | up   |
| FOSL1    | FOS-like antigen 1                                                                      | NM_005438    | 3.2  | down |
| FOXD3    | forkhead box D3                                                                         | NM_012183    | 7.6  | up   |
| FOXRED2  | FAD-dependent oxidoreductase domain containing 2                                        | NM_024955    | 3.6  | up   |
| FRMD4A   | FERM domain containing 4A                                                               | AK001072     | 3.1  | up   |
| GABRP    | gamma-aminobutyric acid (GABA) A receptor, pi                                           | NM_014211    | 22.8 | up   |
| GAD1     | glutamate decarboxylase 1 (brain, 67kDa)                                                | NM_000817    | 8.3  | up   |
| GLB1L2   | galactosidase, beta 1-like 2                                                            | NM_138342    | 3.8  | up   |
| GLS2     | glutaminase 2 (liver, mitochondrial)                                                    | NM_013267    | 11.0 | up   |
| GOLGA7B  | golgin A7 family, member B                                                              | NM_001010917 | 10.6 | down |
| GOLT1A   | golgi transport 1A                                                                      | NM_198447    | 6.9  | up   |
| GPC2     | glypican 2                                                                              | NM_152742    | 2.8  | up   |
| GRAMD4   | GRAM domain containing 4                                                                | NM_015124    | 2.1  | up   |
| GRIN2C   | glutamate receptor, ionotropic, N-methyl D-aspartate 2C                                 | NM_000835    | 13.3 | up   |
| GRIN3B   | glutamate receptor, ionotropic, N-methyl-D-aspartate 3B                                 | NM_138690    | 2.4  | down |
| GUSBP1   | glucuronidase, beta pseudogene 1                                                        | NR_027028    | 2.4  | up   |
| GUSBP11  | glucuronidase, beta pseudogene 11                                                       | NR_024448    | 2.0  | up   |
| HAUS5    | HAUS augmin-like complex, subunit 5                                                     | NM_015302    | 2.4  | up   |
| HEATR5A  | HEAT repeat containing 5A                                                               | BC062720     | 2.0  | down |
| HIF1A    | hypoxia inducible factor 1, alpha subunit (basic helix-loop-helix transcription factor) | NM_181054    | 2.3  | down |
| HOXB13   | homeobox B13                                                                            | NM_006361    | 49.5 | up   |
| HP1BP3   | heterochromatin protein 1, binding protein 3                                            | NM_016287    | 2.1  | up   |

|              |                                                                               |              |      |      |
|--------------|-------------------------------------------------------------------------------|--------------|------|------|
| HTR7         | 5-hydroxytryptamine (serotonin) receptor 7 (adenylate cyclase-coupled)        | NM_019859    | 3.0  | down |
| ICOSLG       | inducible T-cell co-stimulator ligand                                         |              | 3.1  | up   |
| IFT122       | intraflagellar transport 122 homolog (Chlamydomonas)                          | NM_018262    | 2.0  | up   |
| IGSF9        | immunoglobulin superfamily, member 9                                          | NM_020789    | 2.9  | up   |
| IKBKE        | inhibitor of kappa light polypeptide gene enhancer in B-cells, kinase epsilon | NM_014002    | 2.1  | up   |
| IL17RB       | interleukin 17 receptor B                                                     | NM_018725    | 8.7  | up   |
| INPP1        | inositol polyphosphate-1-phosphatase                                          | NM_002194    | 3.5  | up   |
| IRX6         | iroquois homeobox 6                                                           | NM_024335    | 5.2  | up   |
| KATNAL2      | katanin p60 subunit A-like 2                                                  | NM_031303    | 4.8  | up   |
| KCNA2        | potassium voltage-gated channel, shaker-related subfamily, member 2           | NM_001204269 | 11.1 | up   |
| KCNB2        | potassium voltage-gated channel, Shab-related subfamily, member 2             | NM_004770    | 13.1 | up   |
| KCNJ14       | potassium inwardly-rectifying channel, subfamily J, member 14                 | NM_170720    | 2.1  | up   |
| KCNS1        | potassium voltage-gated channel, delayed-rectifier, subfamily S, member 1     | NM_002251    | 63.0 | up   |
| KDM5D        | lysine (K)-specific demethylase 5D                                            | NM_004653    | 4.4  | up   |
| KEL          | Kell blood group, metallo-endoropeptidase                                     | NM_000420    | 13.3 | up   |
| KIAA0368     | KIAA0368                                                                      | NM_001080398 | 2.5  | up   |
| KIAA1147     | KIAA1147                                                                      | NM_001080392 | 2.1  | up   |
| KIAA1328     | KIAA1328                                                                      | NM_020776    | 2.1  | up   |
| KIF13A       | kinesin family member 13A                                                     | NM_022113    | 2.1  | down |
| KIF24        | kinesin family member 24                                                      | NM_194313    | 2.2  | up   |
| KIF25        | kinesin family member 25                                                      | NM_030615    | 14.7 | up   |
| KITLG        | KIT ligand                                                                    | NM_000899    | 2.4  | up   |
| KLHL35       | kelch-like 35 (Drosophila)                                                    | NM_001039548 | 9.5  | up   |
| KNTC1        | kinetochore associated 1                                                      | NM_014708    | 2.6  | up   |
| KREMEN1      | kringle containing transmembrane protein 1                                    | NM_001039570 | 3.0  | up   |
| KRT19P2      | keratin 19 pseudogene 2                                                       | NR_036685    | 33.2 | up   |
| LDHC         | lactate dehydrogenase C                                                       | NM_002301    | 3.3  | up   |
| LEAP2        | liver expressed antimicrobial peptide 2                                       | NM_052971    | 2.7  | up   |
| LIG1         | ligase I, DNA, ATP-dependent                                                  | NM_000234    | 2.6  | up   |
| LINC00152    | long intergenic non-protein coding RNA 152                                    | NR_024204    | 2.0  | down |
| LIPE         | lipase, hormone-sensitive                                                     | NM_005357    | 3.1  | up   |
| LMO4         | LIM domain only 4                                                             | NM_006769    | 3.5  | up   |
| LOC100127891 | uncharacterized LOC100127891                                                  | XR_108812    | 2.1  | down |
| LOC100128191 | uncharacterized LOC100128191                                                  | NR_027157    | 2.9  | up   |
| LOC100129534 | small nuclear ribonucleoprotein polypeptide N pseudogene                      | NR_024489    | 2.9  | up   |
| LOC100130938 | uncharacterized LOC100130938                                                  | XR_110148    | 4.1  | down |
| LOC100131654 | uncharacterized LOC100131654                                                  | AK124891     | 5.5  | up   |
| LOC100132832 | PMS2 postmeiotic segregation increased 2 (S.                                  | NR_028058    | 2.0  | up   |

|              |                                                  |              |      |      |
|--------------|--------------------------------------------------|--------------|------|------|
|              | cerevisiae) pseudogene                           |              |      |      |
| LOC100133050 | glucuronidase, beta pseudogene                   | NR_027503    | 2.1  | up   |
| LOC100170939 | glucuronidase, beta pseudogene                   | NR_024054    | 2.9  | up   |
| LOC100272216 | uncharacterized LOC100272216                     | NR_027439    | 2.2  | up   |
| LOC100288637 | OTU domain containing 7A pseudogene              | NR_038253    | 2.1  | up   |
| LOC100505719 | uncharacterized LOC100505719                     | XR_110561    | 2.6  | up   |
| LOC100505729 | uncharacterized LOC100505729                     | XR_108524    | 2.7  | down |
| LOC100505882 |                                                  | XR_110336    | 2.5  | up   |
| LOC100506003 |                                                  | XR_109785    | 3.9  | up   |
| LOC100506123 | uncharacterized LOC100506123                     | NR_040097    | 3.5  | up   |
| LOC100506503 | uncharacterized LOC100506503                     | XR_109701    | 2.7  | up   |
| LOC100506538 | uncharacterized LOC100506538                     | XR_108868    | 4.0  | up   |
| LOC100506783 | uncharacterized LOC100506783                     | NR_038435    | 3.8  | down |
| LOC100506860 |                                                  | XR_108813    | 2.6  | down |
| LOC100506895 | uncharacterized LOC100506895                     | NR_038276    | 9.8  | down |
| LOC100506994 | uncharacterized LOC100506994                     | NR_038281    | 4.9  | up   |
| LOC100507094 | uncharacterized LOC100507094                     | XR_109558    | 3.3  | up   |
| LOC100507127 | uncharacterized LOC100507127                     | NR_038291    | 10.0 | down |
| LOC100507161 | putative uncharacterized protein NCRNA00269-like | XM_003118878 | 3.4  | up   |
| LOC100507421 | transmembrane protein 178-like                   | NM_001195278 | 9.4  | up   |
| LOC100509075 | uncharacterized LOC100509075                     | XR_111772    | 3.4  | up   |
| LOC100509121 |                                                  | XM_003120334 | 8.9  | up   |
| LOC100509263 | uncharacterized LOC100509263                     | XM_003403443 | 2.7  | up   |
| LOC100652912 | uncharacterized LOC100652912                     | XR_132665    | 2.7  | up   |
| LOC100653329 | uncharacterized LOC100653329                     | XR_133136    | 2.1  | up   |
| LOC100653338 | uncharacterized LOC100653338                     | XR_133053    | 2.1  | down |
| LOC219731    | uncharacterized LOC219731                        | NR_038222    | 3.8  | up   |
| LOC254559    | uncharacterized LOC254559                        | NR_015411    | 8.5  | up   |
| LOC283174    | uncharacterized LOC283174                        | NR_024344    | 7.9  | up   |
| LOC283485    | uncharacterized LOC283485                        | AK093862     | 37.5 | up   |
| LOC284630    | uncharacterized LOC284630                        | AK096384     | 6.1  | up   |
| LOC285084    | uncharacterized LOC285084                        | NR_038897    | 48.5 | up   |
| LOC286161    | uncharacterized LOC286161                        | AK091672     | 2.7  | up   |
| LOC375196    | uncharacterized LOC375196                        | NR_028386    | 18.9 | up   |
| LOC389831    | uncharacterized LOC389831                        | NM_001242480 | 3.2  | up   |
| LOC401068    | uncharacterized LOC401068                        | XR_110024    | 2.3  | up   |
| LOC401109    | uncharacterized LOC401109                        | NR_034088    | 5.5  | up   |
| LOC401431    | uncharacterized LOC401431                        | NR_027040    | 5.7  | up   |
| LOC440792    | proline dehydrogenase (oxidase) 1 pseudogene     | AB051440     | 3.9  | up   |
| LOC441268    | uncharacterized LOC441268                        | AK125166     | 3.6  | up   |
| LOC497257    | uncharacterized LOC497257                        | BC030211     | 2.9  | up   |
| LOC541471    | uncharacterized LOC541471                        | NR_024373    | 2.0  | down |
| LOC541473    | FK506 binding protein 6, 36kDa pseudogene        | NR_003602    | 10.4 | up   |

|           |                                                                                                |              |      |      |
|-----------|------------------------------------------------------------------------------------------------|--------------|------|------|
| LOC642366 | uncharacterized LOC642366                                                                      | XR_108597    | 7.4  | up   |
| LOC728537 | uncharacterized LOC728537                                                                      | NR_038386    | 4.6  | up   |
| LOC729732 | uncharacterized LOC729732                                                                      | XR_132886    | 3.5  | up   |
| LOC84856  | uncharacterized LOC84856                                                                       | NR_026827    | 7.1  | up   |
| LRRC56    | leucine rich repeat containing 56                                                              | NM_198075    | 3.9  | up   |
| LY75      | lymphocyte antigen 75                                                                          | NM_002349    | 3.8  | up   |
| MAGEA6    | melanoma antigen family A, 6                                                                   | NM_175868    | 2.8  | down |
| MAMDC4    | MAM domain containing 4                                                                        | NM_206920    | 2.9  | up   |
| MAP1LC3B  | microtubule-associated protein 1 light chain 3 beta                                            | NM_022818    | 2.1  | down |
| MAP2K4    | mitogen-activated protein kinase kinase 4                                                      | NM_003010    | 2.1  | down |
| MAP3K14   | mitogen-activated protein kinase kinase kinase 14                                              | NM_003954    | 3.2  | up   |
| MAP3K6    | mitogen-activated protein kinase kinase kinase 6                                               | NM_004672    | 2.4  | up   |
| MAP7D2    | MAP7 domain containing 2                                                                       | NM_152780    | 12.2 | up   |
| MCF2L     | MCF.2 cell line derived transforming sequence-like                                             | NM_024979    | 3.4  | up   |
| MCFD2     | multiple coagulation factor deficiency 2                                                       | NM_139279    | 2.1  | down |
| MCM2      | minichromosome maintenance complex component 2                                                 | NM_004526    | 3.4  | up   |
| MCM3      | minichromosome maintenance complex component 3                                                 | NM_002388    | 2.0  | up   |
| MCM5      | minichromosome maintenance complex component 5                                                 | NM_006739    | 2.6  | up   |
| MCM8      | minichromosome maintenance complex component 8                                                 | NM_182802    | 2.6  | up   |
| MDM2      | Mdm2 p53 binding protein homolog (mouse)                                                       | NM_002392    | 2.7  | up   |
| MEI1      | meiosis inhibitor 1                                                                            | NM_152513    | 7.1  | up   |
| MEIS1     | Meis homeobox 1                                                                                | NM_002398    | 2.8  | up   |
| MGAT3     | mannosyl (beta-1,4-)-glycoprotein beta-1,4-N-acetylglucosaminyltransferase                     | NM_002409    | 11.7 | up   |
| MICALL2   | MICAL-like 2                                                                                   | NM_182924    | 2.9  | up   |
| MLF1IP    | MLF1 interacting protein                                                                       | NM_024629    | 2.4  | up   |
| MLLT6     | myeloid/lymphoid or mixed-lineage leukemia (trithorax homolog, Drosophila); translocated to, 6 | NM_005937    | 2.0  | up   |
| MMAA      | methylmalonic aciduria (cobalamin deficiency) cblA type                                        | NM_172250    | 2.8  | up   |
| MOSPD1    | motile sperm domain containing 1                                                               | NM_019556    | 2.4  | down |
| MPDU1     | mannose-P-dolichol utilization defect 1                                                        | AK027742     | 2.4  | down |
| MPP2      | membrane protein, palmitoylated 2 (MAGUK p55 subfamily member 2)                               | NM_005374    | 2.2  | up   |
| MPPED1    | metallophosphoesterase domain containing 1                                                     | NM_001044370 | 5.6  | down |
| MSX2P1    | msh homeobox 2 pseudogene 1                                                                    | NR_002307    | 4.4  | down |
| MTERFD2   | MTERF domain containing 2                                                                      | NR_028049    | 2.7  | up   |
| MTHFD1L   | methylenetetrahydrofolate dehydrogenase (NADP+ dependent) 1-like                               | NM_015440    | 2.3  | down |
| MXD3      | MAX dimerization protein 3                                                                     | NM_001142935 | 3.1  | up   |
| MYB       | v-myb myeloblastosis viral oncogene homolog (avian)                                            | NM_005375    | 5.4  | up   |

|            |                                                                               |              |      |      |
|------------|-------------------------------------------------------------------------------|--------------|------|------|
| MYCN       | v-myc myelocytomatosis viral related oncogene, neuroblastoma derived (avian)  | NM_005378    | 4.9  | up   |
| MYO3A      | myosin IIIA                                                                   | NM_017433    | 9.9  | up   |
| MYO5A      | myosin VA (heavy chain 12, myoxin)                                            | NM_000259    | 2.9  | down |
| NCRNA00185 | non-protein coding RNA 185                                                    | NR_001544    | 9.1  | up   |
| NDST2      | N-deacetylase/N-sulfotransferase (heparan glucosaminyl) 2                     | BC018681     | 2.3  | down |
| NEDD1      | neural precursor cell expressed, developmentally down-regulated 1             | NM_152905    | 2.7  | up   |
| NEURL1B    | neuralized homolog 1B (Drosophila)                                            | NM_001142651 | 2.5  | up   |
| NEURL3     | neuralized homolog 3 (Drosophila) pseudogene                                  | NR_026875    | 6.6  | up   |
| NINJ1      | ninjurin 1                                                                    | NM_004148    | 2.9  | up   |
| NOTCH1     | notch 1                                                                       | NM_017617    | 3.2  | up   |
| NT5E       | 5'-nucleotidase, ecto (CD73)                                                  | NM_002526    | 4.1  | down |
| OXER1      | oxoeicosanoid (OXE) receptor 1                                                | NM_148962    | 3.5  | up   |
| P01115     |                                                                               |              | 12.9 | down |
| PARD6B     | par-6 partitioning defective 6 homolog beta (C. elegans)                      | NM_032521    | 2.2  | up   |
| PAX1       | paired box 1                                                                  | NM_006192    | 39.5 | up   |
| PBX1       | pre-B-cell leukemia homeobox 1                                                | NM_002585    | 3.4  | up   |
| PBX4       | pre-B-cell leukemia homeobox 4                                                | NM_025245    | 3.2  | up   |
| PCLO       | piccolo (presynaptic cytomatrix protein)                                      | NM_014510    | 2.9  | up   |
| PCNA       | proliferating cell nuclear antigen                                            | NM_002592    | 2.2  | up   |
| PCP2       | Purkinje cell protein 2                                                       | NM_174895    | 2.8  | up   |
| PDXK       | pyridoxal (pyridoxine, vitamin B6) kinase                                     | NM_003681    | 3.1  | up   |
| PER3       | period homolog 3 (Drosophila)                                                 | NM_016831    | 2.9  | up   |
| PGM3       | phosphoglucomutase 3                                                          | NM_001199919 | 2.1  | down |
| PGM3       | phosphoglucomutase 3                                                          | NM_015599    | 2.0  | down |
| PIDD       | p53-induced death domain protein                                              | NM_145886    | 2.8  | up   |
| PLB1       | phospholipase B1                                                              | BC065041     | 3.9  | down |
| PLEKHG4    | pleckstrin homology domain containing, family G (with RhoGef domain) member 4 | NM_015432    | 3.6  | up   |
| PLGLB1     | plasminogen-like B1                                                           | NM_001032392 | 3.3  | up   |
| PLXNA1     | plexin A1                                                                     | NM_032242    | 2.5  | up   |
| PMS2L2     | postmeiotic segregation increased 2-like 2 pseudogene                         | BC010535     | 2.0  | up   |
| PODXL2     | podocalyxin-like 2                                                            | NM_015720    | 6.3  | up   |
| POLD1      | polymerase (DNA directed), delta 1, catalytic subunit 125kDa                  | NM_002691    | 2.2  | up   |
| POLE       | polymerase (DNA directed), epsilon                                            | NM_006231    | 2.0  | up   |
| POLH       | polymerase (DNA directed), eta                                                | NM_006502    | 2.8  | up   |
| POU4F1     | POU class 4 homeobox 1                                                        | NM_006237    | 5.9  | up   |
| PP12719    | uncharacterized LOC100653022                                                  | XM_003403527 | 3.0  | up   |
| PPAPDC3    | phosphatidic acid phosphatase type 2 domain containing 3                      |              | 2.5  | down |
| PPARD      | peroxisome proliferator-activated receptor delta                              | NM_006238    | 2.0  | down |

|          |                                                                      |              |      |      |
|----------|----------------------------------------------------------------------|--------------|------|------|
| PPARGC1B | peroxisome proliferator-activated receptor gamma, coactivator 1 beta | NM_133263    | 2.8  | up   |
| PPFIBP2  | PTPRF interacting protein, binding protein 2 (liprin beta 2)         | NM_003621    | 3.0  | up   |
| PPP1R3E  | protein phosphatase 1, regulatory subunit 3E                         | NR_026862    | 2.3  | up   |
| PRELID2  | PRELI domain containing 2                                            | NM_138492    | 2.9  | up   |
| PRIMA1   | proline rich membrane anchor 1                                       | NM_178013    | 6.9  | up   |
| PRINS    | psoriasis associated RNA induced by stress (non-protein coding)      | NR_023388    | 3.8  | up   |
| PROCR    | protein C receptor, endothelial                                      | NM_006404    | 3.5  | down |
| PRODH    | proline dehydrogenase (oxidase) 1                                    | NM_016335    | 6.2  | up   |
| PSIP1    | PC4 and SFRS1 interacting protein 1                                  | NM_021144    | 2.5  | up   |
| PSIP1    | PC4 and SFRS1 interacting protein 1                                  | NM_033222    | 2.6  | up   |
| PTH1H    | parathyroid hormone-like hormone                                     | NM_198965    | 18.4 | down |
| PTN      | pleiotrophin                                                         | NM_002825    | 8.6  | up   |
| PTPRF    | protein tyrosine phosphatase, receptor type, F                       | NM_002840    | 2.1  | up   |
| PTPRS    | protein tyrosine phosphatase, receptor type, S                       | NM_002850    | 2.4  | up   |
| QSOX1    | quiescin Q6 sulfhydryl oxidase 1                                     | NM_001004128 | 2.1  | down |
| RALGPS1  | Ral GEF with PH domain and SH3 binding motif 1                       | NM_014636    | 4.3  | up   |
| RANBP17  | RAN binding protein 17                                               | NM_022897    | 9.3  | up   |
| RBM14    | RNA binding motif protein 14                                         | NM_006328    | 2.5  | up   |
| REM1     | RAS (RAD and GEM)-like GTP-binding 1                                 | NM_014012    | 6.2  | up   |
| RGNEF    | 190 kDa guanine nucleotide exchange factor                           | NM_001177693 | 2.1  | up   |
| RGS20    | regulator of G-protein signaling 20                                  | NM_170587    | 7.6  | down |
| RHBDL3   | rhomboid, veinlet-like 3 (Drosophila)                                | NM_138328    | 8.5  | up   |
| RHOXF1   | Rhox homeobox family, member 1                                       | NM_139282    | 4.9  | up   |
| RIBC2    | RIB43A domain with coiled-coils 2                                    | NM_015653    | 10.0 | up   |
| RNF150   | ring finger protein 150                                              | NM_020724    | 4.8  | up   |
| RNF165   | ring finger protein 165                                              | NM_152470    | 5.0  | up   |
| RNF207   | ring finger protein 207                                              | NM_207396    | 5.7  | up   |
| RNF212   | ring finger protein 212                                              | NM_001131034 | 16.3 | up   |
| RNF32    | ring finger protein 32                                               | NM_030936    | 5.7  | up   |
| RNF43    | ring finger protein 43                                               | NM_017763    | 2.6  | up   |
| RNF44    | ring finger protein 44                                               | NM_014901    | 2.0  | up   |
| RNPC3    | RNA-binding region (RNP1, RRM) containing 3                          | AK289844     | 2.6  | up   |
| RPA2     | replication protein A2, 32kDa                                        | NM_002946    | 2.3  | up   |
| RPF2     | ribosome production factor 2 homolog (S. cerevisiae)                 | NM_032194    | 2.0  | down |
| RPL3L    | ribosomal protein L3-like                                            | NM_005061    | 2.9  | down |
| RTKN2    | rhotekin 2                                                           | NM_145307    | 2.3  | up   |
| RTP3     | receptor (chemosensory) transporter protein 3                        | NM_031440    | 16.4 | up   |
| SAMD8    | sterile alpha motif domain containing 8                              | NM_144660    | 2.3  | down |
| SAP18    | Sin3A-associated protein, 18kDa                                      | NM_005870    | 2.1  | up   |
| SCAI     | suppressor of cancer cell invasion                                   | NM_173690    | 2.4  | up   |

|          |                                                                                                                  |              |      |      |
|----------|------------------------------------------------------------------------------------------------------------------|--------------|------|------|
| SEMA4C   | sema domain, immunoglobulin domain (Ig), transmembrane domain (TM) and short cytoplasmic domain, (semaphorin) 4C | NM_017789    | 2.2  | up   |
| SESN3    | sestrin 3                                                                                                        | NM_144665    | 2.4  | down |
| SFI1     | Sfi1 homolog, spindle assembly associated (yeast)                                                                | NM_001007467 | 2.2  | up   |
| SIM2     | single-minded homolog 2 (Drosophila)                                                                             | NM_005069    | 13.1 | up   |
| SLC16A10 | solute carrier family 16, member 10 (aromatic amino acid transporter)                                            | NM_018593    | 3.3  | down |
| SLC16A8  | solute carrier family 16, member 8 (monocarboxylic acid transporter 3)                                           | NM_013356    | 5.5  | up   |
| SLC1A1   | solute carrier family 1 (neuronal/epithelial high affinity glutamate transporter, system Xag), member 1          | NM_004170    | 4.1  | up   |
| SLC25A23 | solute carrier family 25 (mitochondrial carrier; phosphate carrier), member 23                                   | NM_024103    | 3.2  | up   |
| SLC35E2  | solute carrier family 35, member E2                                                                              | NM_182838    | 2.5  | up   |
| SLC37A2  | solute carrier family 37 (glycerol-3-phosphate transporter), member 2                                            | NM_198277    | 2.0  | down |
| SLC7A5   | solute carrier family 7 (amino acid transporter light chain, L system), member 5                                 | NM_003486    | 4.0  | down |
| SLC7A8   | solute carrier family 7 (amino acid transporter light chain, L system), member 8                                 | NM_182728    | 6.2  | down |
| SMA4     | glucuronidase, beta pseudogene                                                                                   | NR_029426    | 3.4  | up   |
| SMARCA2  | SWI/SNF related, matrix associated, actin dependent regulator of chromatin, subfamily a, member 2                | NM_139045    | 2.5  | up   |
| SMC1B    | structural maintenance of chromosomes 1B                                                                         | NM_148674    | 84.2 | up   |
| SMPDL3B  | sphingomyelin phosphodiesterase, acid-like 3B                                                                    | NM_001009568 | 4.1  | up   |
| SNORA17  | small nucleolar RNA, H/ACA box 17                                                                                | NR_002958    | 2.3  | down |
| SNORA43  | small nucleolar RNA, H/ACA box 43                                                                                | NR_002975    | 2.7  | down |
| SNORA71A | small nucleolar RNA, H/ACA box 71A                                                                               | NR_002911    | 2.2  | down |
| SNORD65  | small nucleolar RNA, C/D box 65                                                                                  | NR_003054    | 3.5  | down |
| SNORD93  | small nucleolar RNA, C/D box 93                                                                                  | NR_003075    | 3.8  | down |
| SP9      | Sp9 transcription factor homolog (mouse)                                                                         |              | 19.0 | up   |
| SPIB     | Spi-B transcription factor (Spi-1/PU.1 related)                                                                  | NM_003121    | 15.2 | up   |
| SPRR4    | small proline-rich protein 4                                                                                     | NM_173080    | 16.9 | down |
| SRGAP3   | SLIT-ROBO Rho GTPase activating protein 3                                                                        | NM_014850    | 5.2  | up   |
| SSX2IP   | synovial sarcoma, X breakpoint 2 interacting protein                                                             | NM_014021    | 2.6  | up   |
| STAG3    | stromal antigen 3                                                                                                | NM_012447    | 16.0 | up   |
| STAR     | steroidogenic acute regulatory protein                                                                           | NM_000349    | 9.2  | up   |
| STRN3    | striatin, calmodulin binding protein 3                                                                           | NM_014574    | 2.1  | down |
| SUSD4    | sushi domain containing 4                                                                                        | NM_017982    | 6.3  | up   |
| SUV420H2 | suppressor of variegation 4-20 homolog 2 (Drosophila)                                                            | NM_032701    | 2.1  | up   |
| SV2B     | synaptic vesicle glycoprotein 2B                                                                                 | NM_014848    | 6.2  | up   |
| SYCE2    | synaptonemal complex central element protein 2                                                                   | NM_001105578 | 9.6  | up   |
| SYCP2    | synaptonemal complex protein 2                                                                                   | NM_014258    | 30.2 | up   |



|          |                                                                  |              |      |      |
|----------|------------------------------------------------------------------|--------------|------|------|
| SYNGR3   | synaptogyrin 3                                                   | NM_004209    | 2.9  | up   |
| SYNPO2   | synaptopodin 2                                                   | NM_133477    | 20.7 | up   |
| TCAM1P   | testicular cell adhesion molecule 1 homolog (mouse), pseudogene  | NR_002947    | 17.6 | up   |
| TCP11    | t-complex 11 homolog (mouse)                                     | NM_018679    | 4.3  | up   |
| TCTEX1D4 | Tctex1 domain containing 4                                       | NM_001013632 | 2.2  | down |
| THBS1    | thrombospondin 1                                                 | NM_003246    | 2.6  | down |
| TIMELESS | timeless homolog (Drosophila)                                    | NM_003920    | 2.5  | up   |
| TLR5     | toll-like receptor 5                                             | NM_003268    | 2.3  | up   |
| TLX2     | T-cell leukemia homeobox 2                                       | NM_016170    | 5.6  | up   |
| TLX3     | T-cell leukemia homeobox 3                                       | NM_021025    | 20.8 | up   |
| TM7SF3   | transmembrane 7 superfamily member 3                             | NM_016551    | 2.8  | up   |
| TMCO4    | transmembrane and coiled-coil domains 4                          | NM_181719    | 2.4  | up   |
| TMEM194A | transmembrane protein 194A                                       | NM_015257    | 2.2  | up   |
| TMSB4Y   | thymosin beta 4, Y-linked                                        | NM_004202    | 3.7  | up   |
| TNFAIP2  | tumor necrosis factor, alpha-induced protein 2                   | NM_006291    | 3.5  | up   |
| TPD52    | tumor protein D52                                                | NM_001025252 | 2.5  | up   |
| TPM4     | tropomyosin 4                                                    | NM_003290    | 2.1  | down |
| TRIM50   | tripartite motif containing 50                                   | NM_178125    | 6.1  | up   |
| TRMT12   | tRNA methyltransferase 12 homolog (S. cerevisiae)                | NM_017956    | 2.8  | down |
| TROAP    | trophinin associated protein (tastin)                            | NM_005480    | 2.5  | up   |
| TSC2     | tuberous sclerosis 2                                             | NM_000548    | 2.0  | up   |
| TTC7B    | tetratricopeptide repeat domain 7B                               | NM_001010854 | 3.3  | down |
| TTC9C    | tetratricopeptide repeat domain 9C                               | AF289605     | 2.5  | up   |
| TTY14    | testis-specific transcript, Y-linked 14 (non-protein coding)     | NR_001543    | 2.7  | up   |
| TTY15    | testis-specific transcript, Y-linked 15 (non-protein coding)     | NR_001545    | 4.2  | up   |
| TXLNG2P  | taxilin gamma 2, pseudogene                                      | NR_045128    | 6.7  | up   |
| TXLNG2P  | taxilin gamma 2, pseudogene                                      | NR_045129    | 5.4  | up   |
| TYMS     | thymidylate synthetase                                           | NM_001071    | 2.5  | up   |
| UBE2H    | ubiquitin-conjugating enzyme E2H                                 | NM_003344    | 2.2  | down |
| UBE2Q2   | ubiquitin-conjugating enzyme E2Q family member 2                 | NM_173469    | 2.0  | down |
| UPB1     | ureidopropionase, beta                                           | NM_016327    | 5.6  | up   |
| URB1     | URB1 ribosome biogenesis 1 homolog (S. cerevisiae)               | NM_014825    | 2.3  | up   |
| UTY      | ubiquitously transcribed tetratricopeptide repeat gene, Y-linked | NM_182660    | 4.5  | up   |
| VCAM1    | vascular cell adhesion molecule 1                                | NM_001078    | 8.0  | up   |
| WDR34    | WD repeat domain 34                                              | NM_052844    | 2.1  | up   |
| WHSC1    | Wolf-Hirschhorn syndrome candidate 1                             | NM_133330    | 2.4  | up   |
| WIPF3    | WAS/WASL interacting protein family, member 3                    | AK094250     | 5.1  | up   |
| WNK2     | WNK lysine deficient protein kinase 2                            | NM_006648    | 8.3  | up   |
| XIST     | X (inactive)-specific transcript (non-protein coding)            | NR_001564    | 12.7 | down |
| XKR4     | XK, Kell blood group complex subunit-related family, member 4    | NM_052898    | 13.7 | up   |

|                |  |              |      |      |
|----------------|--|--------------|------|------|
| XLOC_000190    |  |              | 4.4  | up   |
| XLOC_000363    |  |              | 3.7  | up   |
| XLOC_000441    |  | AK023394     | 3.1  | up   |
| XLOC_000778    |  |              | 6.2  | down |
| XLOC_000956    |  | BX089534     | 4.6  | up   |
| XLOC_001286    |  |              | 4.6  | up   |
| XLOC_001784    |  |              | 2.2  | down |
| XLOC_001869    |  |              | 2.5  | down |
| XLOC_002484    |  | AK307257     | 2.2  | down |
| XLOC_002779    |  | BC035247     | 3.3  | up   |
| XLOC_005105    |  | BX096383     | 4.2  | down |
| XLOC_005935    |  | CB123670     | 5.8  | down |
| XLOC_006915    |  | DA998032     | 2.0  | down |
| XLOC_008152    |  |              | 2.6  | up   |
| XLOC_008323    |  |              | 3.5  | up   |
| XLOC_008700    |  |              | 6.9  | down |
| XLOC_009507    |  | AK054718     | 4.5  | up   |
| XLOC_009994    |  |              | 2.3  | down |
| XLOC_011545    |  |              | 7.3  | up   |
| XLOC_011546    |  |              | 7.7  | up   |
| XLOC_012079    |  |              | 2.8  | up   |
| XLOC_012452    |  | BC084573     | 11.2 | down |
| XLOC_012895    |  |              | 3.6  | up   |
| XLOC_013364    |  |              | 3.5  | down |
| XLOC_013541    |  | BX116929     | 4.6  | down |
| XLOC_013981    |  | BX105611     | 2.6  | up   |
| XLOC_014111    |  | DB312214     | 4.2  | up   |
| XLOC_014257    |  |              | 4.9  | up   |
| XLOC_014288    |  |              | 3.2  | up   |
| XLOC_014388    |  | XR_109724    | 3.9  | up   |
| XLOC_I2_000101 |  |              | 3.1  | up   |
| XLOC_I2_003293 |  | XM_001715897 | 3.7  | up   |
| XLOC_I2_003293 |  | XM_003119524 | 4.7  | up   |
| XLOC_I2_003293 |  |              | 5.9  | up   |
| XLOC_I2_006152 |  | AK311448     | 2.3  | up   |
| XLOC_I2_006595 |  |              | 2.1  | down |
| XLOC_I2_006745 |  |              | 2.5  | up   |
| XLOC_I2_008151 |  |              | 3.4  | up   |
| XLOC_I2_008991 |  |              | 4.9  | up   |
| XLOC_I2_009273 |  | AK127572     | 3.1  | up   |
| XLOC_I2_009301 |  |              | 7.1  | up   |
| XLOC_I2_009316 |  |              | 5.4  | up   |
| XLOC_I2_009668 |  |              | 6.9  | up   |

|                |                                                                        |              |      |      |
|----------------|------------------------------------------------------------------------|--------------|------|------|
| XLOC_I2_009888 |                                                                        |              | 2.1  | down |
| XLOC_I2_010139 |                                                                        |              | 2.2  | down |
| XLOC_I2_010141 |                                                                        | DA697996     | 4.0  | down |
| XLOC_I2_011011 |                                                                        | BC036795     | 2.0  | up   |
| XLOC_I2_011649 |                                                                        |              | 2.7  | up   |
| XLOC_I2_013124 |                                                                        | AJ606328     | 7.8  | down |
| XLOC_I2_013293 |                                                                        | BQ441651     | 2.3  | down |
| XLOC_I2_015892 |                                                                        |              | 3.9  | up   |
| XLOC_I2_015907 |                                                                        |              | 2.1  | down |
| XPNPEP3        | X-prolyl aminopeptidase (aminopeptidase P) 3, putative                 | NM_001204827 | 2.0  | down |
| XRCC1          | X-ray repair complementing defective repair in Chinese hamster cells 1 | NM_006297    | 2.3  | up   |
| YBX2           | Y box binding protein 2                                                | NM_015982    | 8.2  | up   |
| ZADH2          | zinc binding alcohol dehydrogenase domain containing 2                 | NM_175907    | 2.0  | up   |
| ZCWPW1         | zinc finger, CW type with PWWP domain 1                                | NM_017984    | 3.6  | up   |
| ZDHC23         | zinc finger, DHHC-type containing 23                                   | NM_173570    | 3.0  | up   |
| ZFHX2          | zinc finger homeobox 2                                                 | NM_033400    | 3.0  | up   |
| ZFP14          | zinc finger protein 14 homolog (mouse)                                 | NM_020917    | 3.3  | up   |
| ZFP3           | zinc finger protein 3 homolog (mouse)                                  | NM_153018    | 2.2  | up   |
| ZFP62          | zinc finger protein 62 homolog (mouse)                                 | NM_152283    | 2.0  | up   |
| ZMIZ2          | zinc finger, MIZ-type containing 2                                     | NM_031449    | 2.8  | up   |
| ZNF10          | zinc finger protein 10                                                 | NM_015394    | 2.1  | up   |
| ZNF346         | zinc finger protein 346                                                | NM_012279    | 2.8  | up   |
| ZNF541         | zinc finger protein 541                                                | NM_001101419 | 54.1 | up   |
| ZNF655         | zinc finger protein 655                                                | NM_024061    | 2.3  | down |
| ZNF827         | zinc finger protein 827                                                | NM_178835    | 2.1  | up   |
| ZNF862         | zinc finger protein 862                                                | NM_001099220 | 3.6  | up   |
| ZYG11A         | zyg-11 homolog A (C. elegans)                                          | NM_001004339 | 5.6  | up   |

Table S8: List of DEGs, HPV-inactive vs HPV-negative, FC 2.

|              |                                                                                               |                   | HPV Inactive vs HPV Negative |            |
|--------------|-----------------------------------------------------------------------------------------------|-------------------|------------------------------|------------|
| GeneSymbol   | GeneName                                                                                      | Genbank Accession | FC (abs)                     | Regulation |
| AGPAT4       | 1-acylglycerol-3-phosphate O-acyltransferase 4 (lysophosphatidic acid acyltransferase, delta) | NM_020133         | 2.3                          | down       |
| ANKRD43      | ankyrin repeat domain 43                                                                      | NM_175873         | 2.1                          | up         |
| ATP8B3       | ATPase, aminophospholipid transporter, class I, type 8B, member 3                             | NM_138813         | 3.0                          | up         |
| BTNL9        | butyrophilin-like 9                                                                           | NM_152547         | 2.3                          | up         |
| C13orf16     | chromosome 13 open reading frame 16                                                           | NM_152324         | 2.2                          | down       |
| C4orf7       | chromosome 4 open reading frame 7                                                             | NM_152997         | 2.3                          | up         |
| C7orf13      | chromosome 7 open reading frame 13                                                            | NR_026865         | 2.1                          | down       |
| CA12         | carbonic anhydrase XII                                                                        | NM_001218         | 2.1                          | down       |
| CD36         | CD36 molecule (thrombospondin receptor)                                                       | NM_001001547      | 6.4                          | up         |
| CELF4        | CUGBP, Elav-like family member 4                                                              | NM_020180         | 2.5                          | up         |
| EXOC3L4      | exocyst complex component 3-like 4                                                            | NM_001077594      | 2.0                          | up         |
| EXOC6B       | exocyst complex component 6B                                                                  | NM_015189         | 2.1                          | down       |
| FOSL1        | FOS-like antigen 1                                                                            | NM_005438         | 2.7                          | down       |
| GOLGA7B      | golgin A7 family, member B                                                                    | NM_001010917      | 2.0                          | down       |
| HOXB13       | homeobox B13                                                                                  | NM_006361         | 2.1                          | up         |
| KDM5D        | lysine (K)-specific demethylase 5D                                                            | NM_004653         | 2.7                          | down       |
| KRT19P2      | keratin 19 pseudogene 2                                                                       | NR_036685         | 2.5                          | down       |
| LIPE         | lipase, hormone-sensitive                                                                     | NM_005357         | 2.3                          | up         |
| LOC100505882 |                                                                                               | XR_110336         | 2.9                          | down       |
| LOC100506783 | uncharacterized LOC100506783                                                                  | NR_038435         | 3.5                          | up         |
| LOC100506895 | uncharacterized LOC100506895                                                                  | NR_038276         | 2.5                          | down       |
| LOC100507127 | uncharacterized LOC100507127                                                                  | NR_038291         | 3.3                          | down       |
| LOC100509121 |                                                                                               | XM_003120334      | 4.6                          | down       |
| LOC283485    | uncharacterized LOC283485                                                                     | AK093862          | 2.7                          | up         |
| LOC401431    | uncharacterized LOC401431                                                                     | NR_027040         | 2.1                          | up         |
| LOC497257    | uncharacterized LOC497257                                                                     | BC030211          | 2.1                          | up         |
| LOC84856     | uncharacterized LOC84856                                                                      | NR_026827         | 2.1                          | up         |
| NCRNA00185   | non-protein coding RNA 185                                                                    | NR_001544         | 3.2                          | down       |
| NEURL3       | neuralized homolog 3 (Drosophila) pseudogene                                                  | NR_026875         | 2.0                          | down       |
| P01115       |                                                                                               |                   | 3.3                          | down       |
| PTH1H        | parathyroid hormone-like hormone                                                              | NM_198965         | 3.4                          | down       |
| RGNEF        | 190 kDa guanine nucleotide exchange factor                                                    | NM_001177693      | 2.1                          | down       |
| RGS20        | regulator of G-protein signaling 20                                                           | NM_170587         | 2.8                          | down       |
| RTP3         | receptor (chemosensory) transporter protein 3                                                 | NM_031440         | 3.1                          | down       |
| SLC16A10     | solute carrier family 16, member 10 (aromatic amino acid transporter)                         | NM_018593         | 2.2                          | down       |

|             |                                                                  |              |     |      |
|-------------|------------------------------------------------------------------|--------------|-----|------|
| SPRR4       | small proline-rich protein 4                                     | NM_173080    | 3.5 | down |
| SYNPO2      | synaptopodin 2                                                   | NM_133477    | 2.4 | up   |
| TNXB        | tenascin XB                                                      | NM_019105    | 2.3 | up   |
| TTY15       | testis-specific transcript, Y-linked 15 (non-protein coding)     | NR_001545    | 3.8 | down |
| TXLNG2P     | taxilin gamma 2, pseudogene                                      | NR_045128    | 3.4 | down |
| TXLNG2P     | taxilin gamma 2, pseudogene                                      | NR_045129    | 4.3 | down |
| UTY         | ubiquitously transcribed tetratricopeptide repeat gene, Y-linked | NM_182660    | 3.0 | down |
| XIST        | X (inactive)-specific transcript (non-protein coding)            | NR_001564    | 2.2 | up   |
| XLOC_005105 |                                                                  | BX096383     | 2.6 | down |
| XLOC_005935 |                                                                  | CB123670     | 2.0 | down |
| XLOC_008323 |                                                                  |              | 2.2 | down |
| XLOC_012452 |                                                                  | BC084573     | 4.8 | down |
| ZNF541      | zinc finger protein 541                                          | NM_001101419 | 2.2 | up   |
| ZNF827      | zinc finger protein 827                                          | NM_178835    | 2.0 | down |
| ZNF862      | zinc finger protein 862                                          | NM_001099220 | 2.0 | up   |
| ZYG11A      | zyg-11 homolog A (C. elegans)                                    | NM_001004339 | 2.8 | down |

Table S9: AA HPV-Negative vs EA HPV-Negative tumors p 0.02, FC 2

| FC (abs) | Direction of change | Gene Symbol | Genbank Accession |
|----------|---------------------|-------------|-------------------|
| 2.52     | down                | AADAT       | NM_016228         |
| 2.87     | down                | ABCC6       | NM_001079528      |
| 4.09     | down                | ADAM12      | NM_021641         |
| 2.25     | down                | ADC         | NM_052998         |
| 3.75     | down                | ADRA2C      | NM_000683         |
| 2.46     | up                  | AIF1L       | NM_001185096      |
| 3.59     | up                  | ALDH7A1     | NM_001182         |
| 2.95     | up                  | ALDH7A1     | NM_001182         |
| 2.80     | down                | ANKK1       | NM_178510         |
| 2.13     | down                | ARHGAP1     | NM_004308         |
| 2.37     | up                  | ATG4C       | NM_032852         |
| 3.23     | down                | ATP9A       | NM_006045         |
| 2.48     | down                | ATP9A       | NM_006045         |
| 2.60     | down                | AVIL        | NM_006576         |
| 3.16     | down                | BBS5        | NM_152384         |
| 2.33     | down                | BCAS3       | NM_017679         |
| 2.59     | up                  | BFSP2       | NM_003571         |
| 2.54     | down                | BHLHB9      | NM_030639         |
| 2.42     | down                | C10orf114   | NM_001010911      |
| 5.76     | down                | C11orf53    | NM_198498         |
| 4.42     | down                | C11orf70    | NM_001195005      |
| 3.46     | down                | C11orf70    | NM_032930         |
| 2.43     | down                | C14orf132   | NR_023938         |
| 2.58     | up                  | C17orf105   | NM_001136483      |
| 3.74     | down                | C19orf21    | NM_173481         |
| 2.79     | up                  | C1orf210    | NM_182517         |
| 2.09     | down                | C20orf108   | NM_080821         |
| 2.13     | up                  | C21orf33    |                   |
| 2.53     | down                | C4orf47     | NM_001114357      |
| 2.11     | up                  | C5orf44     | NR_003545         |
| 2.17     | down                | C8orf42     | NM_175075         |
| 2.96     | down                | CCDC40      | NM_001243342      |
| 2.03     | down                | CD151       | NM_004357         |
| 2.57     | down                | CDH13       | NM_001257         |
| 6.94     | down                | CFHR4       | NM_006684         |
| 4.15     | down                | CHST6       | NM_021615         |
| 2.34     | down                | COL27A1     | AK021957          |

|      |      |           |              |
|------|------|-----------|--------------|
| 2.70 | down | COL7A1    | NM_000094    |
| 2.16 | up   | CPA5      | NM_001127442 |
| 2.68 | down | CPAMD8    | NM_015692    |
| 3.00 | up   | CRYBB2    | NM_000496    |
| 2.85 | up   | CRYBB2P1  | NR_033734    |
| 6.27 | down | CST2      | NM_001322    |
| 2.71 | down | CXCR7     | NM_020311    |
| 2.37 | up   | CYB5RL    | BC071735     |
| 4.18 | down | CYP27C1   | NM_001001665 |
| 2.18 | down | DCBLD1    | NM_173674    |
| 3.39 | down | DDX11L9   | NR_034090    |
| 2.26 | down | DHRS3     | NM_004753    |
| 5.16 | down | DNAH17    |              |
| 8.43 | down | DNAH5     | NM_001369    |
| 6.31 | up   | DNASE1L3  | NM_004944    |
| 2.76 | down | DYNLRB2   | NM_130897    |
| 2.18 | up   | ECEL1P2   | NR_028501    |
| 2.41 | down | EFCAB1    | NM_001142857 |
| 2.61 | down | EFHC2     | NM_025184    |
| 4.40 | up   | EIF2A     | NM_032025    |
| 2.06 | down | ENC1      | NM_003633    |
| 5.71 | down | ENKUR     | NM_145010    |
| 2.92 | down | EPHA3     | NM_005233    |
| 2.69 | down | FAM114A1  | NM_138389    |
| 4.00 | down | FAM164A   | NM_016010    |
| 2.79 | down | FAM87B    | XR_112085    |
| 3.14 | down | FAT1      | NM_005245    |
| 3.02 | down | FBXO32    | NM_058229    |
| 2.06 | up   | FCER1G    |              |
| 3.13 | down | FHOD3     | NM_025135    |
| 2.19 | down | FLJ20021  | NR_033874    |
| 4.39 | down | FLJ37644  | XR_109424    |
| 2.73 | down | FLJ45671  | AK127576     |
| 3.62 | down | FLJ45983  | NR_024256    |
| 2.36 | down | FRG1B     | BC095491     |
| 4.56 | up   | FUT7      | NM_004479    |
| 2.39 | down | FZD1      | NM_003505    |
| 3.03 | down | GHR       | NM_001242462 |
| 2.26 | up   | GNASAS    |              |
| 2.20 | down | GOLGA6L10 | NM_001164465 |
| 2.10 | down | GOLGA6L10 | NM_001164465 |
| 2.12 | down | GOLGA6L9  | NM_198181    |
| 2.07 | down | GOLGA6L9  | NM_198181    |
| 2.42 | down | GPR125    | NM_145290    |
| 2.33 | up   | GPR31     | NM_005299    |
| 2.35 | down | GPR56     | NM_201525    |
| 6.94 | down | GUCY1B2   | NR_003923    |
| 2.60 | down | HGSNAT    | NM_152419    |
| 2.01 | down | HHAT      | NM_018194    |

|       |      |              |              |
|-------|------|--------------|--------------|
| 2.04  | up   | HHEX         | NM_002729    |
| 2.03  | down | HOMER3       | NM_001145722 |
| 2.55  | down | HSPG2        | NM_005529    |
| 2.35  | down | HTATSFP2     | BX648511     |
| 5.34  | down | IBSP         | NM_004967    |
| 2.11  | down | IER5L        | NM_203434    |
| 4.20  | up   | IL1R2        | NM_004633    |
| 2.11  | down | ITGAV        | NM_002210    |
| 2.07  | down | ITGB4        | NM_000213    |
| 2.11  | down | ITGB5        | NM_002213    |
| 2.25  | down | JAG1         | NM_000214    |
| 2.04  | down | KDM5B        | NM_006618    |
| 3.49  | down | KIAA1549     | NM_001164665 |
| 2.12  | down | KIF16B       | NM_001199866 |
| 2.02  | down | KIF16B       | NM_024704    |
| 3.63  | down | KIF26B       | NM_018012    |
| 4.27  | down | LARP6        | NM_197958    |
| 2.66  | down | LARP6        | NM_018357    |
| 2.39  | down | LCA5         | NM_181714    |
| 2.58  | down | LEPR         | NM_001003680 |
| 5.78  | down | LIF          | NM_002309    |
| 3.49  | down | LIMCH1       | NM_014988    |
| 3.45  | down | LINC00174    | NR_026873    |
| 8.75  | down | LINGO2       | NM_152570    |
| 2.11  | up   | LOC100128164 | NR_027622    |
| 2.13  | down | LOC100130027 | XR_110587    |
| 2.07  | up   | LOC100131581 | AK092544     |
| 2.44  | up   | LOC100132147 | BC036435     |
| 2.80  | down | LOC100133299 | XR_108564    |
| 2.08  | up   | LOC100133612 | NR_024455    |
| 2.01  | down | LOC100170939 | NR_024054    |
| 3.75  | down | LOC100216001 | NR_024475    |
| 3.46  | down | LOC100216001 | NR_024475    |
| 3.45  | down | LOC100240735 | NR_026658    |
| 2.64  | down | LOC100270746 | NR_026776    |
| 3.15  | down | LOC100288748 | NR_034034    |
| 3.46  | up   | LOC100294145 | NR_037177    |
| 2.69  | up   | LOC100294145 | NR_037177    |
| 10.94 | down | LOC100505495 | NR_040109    |
| 3.04  | down | LOC100505634 | XR_109905    |
| 3.47  | down | LOC100505912 | NR_037877    |
| 2.58  | up   | LOC100506302 | XR_108708    |
| 2.80  | up   | LOC100506328 | XR_109927    |
| 3.30  | down | LOC100506451 | AK090817     |
| 4.30  | down | LOC100506718 | XR_110230    |
| 5.50  | down | LOC100507150 | XR_108536    |
| 2.52  | down | LOC100507299 | NR_039990    |
| 3.57  | up   | LOC100507429 | XR_110179    |
| 3.52  | up   | LOC100507429 | XR_110179    |



|       |      |              |              |
|-------|------|--------------|--------------|
| 3.69  | down | LOC100507460 | XR_109894    |
| 3.42  | down | LOC100507460 | XR_109894    |
| 3.36  | down | LOC100507474 | XR_109895    |
| 4.82  | down | LOC100507580 | XR_109752    |
| 2.04  | down | LOC100507624 | XR_110188    |
| 2.99  | up   | LOC100508384 | XM_003119544 |
| 2.31  | up   | LOC100652730 | XR_132670    |
| 2.12  | up   | LOC100652730 | XR_132670    |
| 2.06  | down | LOC100652838 | XR_132689    |
| 4.97  | up   | LOC146880    | NR_026899    |
| 4.72  | up   | LOC219347    | NR_027428    |
| 3.70  | down | LOC283861    | AK098143     |
| 3.10  | up   | LOC388906    | NR_036498    |
| 2.25  | up   | LOC440570    | XR_113295    |
| 2.74  | down | LOC441204    | NR_015364    |
| 2.01  | down | LOC541471    | NR_015395    |
| 2.13  | down | LOC645954    | XR_109026    |
| 8.39  | down | LOC729444    | NR_038388    |
| 2.50  | down | LRP12        | NM_013437    |
| 2.02  | down | MAGI2        | NM_012301    |
| 10.38 | up   | MAL          | NM_002371    |
| 3.83  | down | MCOLN3       | BC060765     |
| 2.96  | down | MECOM        | NM_004991    |
| 3.60  | down | MGC4294      | XR_109628    |
| 2.78  | down | MIR143HG     | NR_027180    |
| 26.40 | down | MMP7         | NM_002423    |
| 2.26  | down | MN1          | NM_002430    |
| 2.40  | up   | MPRIP        |              |
| 2.57  | down | MRC2         | NM_006039    |
| 3.82  | up   | MZT2A        |              |
| 2.08  | down | ND4L         | AK311996     |
| 2.06  | down | NEAT1        | AF001893     |
| 3.51  | down | NEK10        | AK057247     |
| 4.66  | down | NLGN4X       | NM_020742    |
| 3.82  | down | NLGN4Y       | NM_014893    |
| 2.18  | up   | NPHS1        | NM_004646    |
| 2.49  | down | NRP2         | NM_201264    |
| 2.12  | down | NRP2         | NM_201264    |
| 2.62  | down | NUAK1        | NM_014840    |
| 6.01  | up   | OTOP3        | NM_178233    |
| 2.54  | down | PALLD        | NM_001166109 |
| 2.03  | down | PALLD        | NM_016081    |
| 2.05  | down | PBX3         | NM_006195    |
| 2.23  | down | PDXDC2P      | BX647358     |
| 2.24  | down | PER3         | NM_016831    |
| 2.20  | down | PGM5P2       | NR_002836    |
| 4.12  | down | PLCB4        | NM_182797    |
| 2.02  | down | PLEC         | NM_201380    |
| 3.50  | down | PMEPA1       | NM_020182    |

|      |      |          |              |
|------|------|----------|--------------|
| 3.12 | down | PMEPA1   | NM_020182    |
| 2.58 | down | PNMA6C   | NM_001170944 |
| 3.01 | down | PPARGC1A | NM_013261    |
| 2.54 | down | PPP1R1C  | NM_001080545 |
| 2.11 | down | PRICKLE1 | NM_153026    |
| 2.14 | down | PROCA1   | NM_152465    |
| 5.19 | up   | PSPH     | NM_004577    |
| 2.22 | down | PTPRG    | NM_002841    |
| 2.38 | down | PTPRU    | NM_005704    |
| 2.32 | down | RAI14    | NM_015577    |
| 2.42 | down | RASGEF1A | NM_145313    |
| 2.13 | up   | RASGRP2  | NM_153819    |
| 2.00 | up   | RAX      | NM_013435    |
| 2.27 | down | RBMS3    | NM_014483    |
| 2.63 | down | RBPMS    | AK057533     |
| 2.01 | down | RHOBTB1  | NM_001242359 |
| 2.50 | up   | RNF112   | NM_007148    |
| 2.48 | down | RPS23    | NM_001025    |
| 2.07 | up   | RSPH9    | AK055407     |
| 2.03 | up   | RXRG     | NR_033824    |
| 5.41 | down | SALL4    | NM_020436    |
| 2.19 | down | SEC14L2  | NM_033382    |
| 3.20 | down | SEPW1    | NM_003009    |
| 2.44 | down | SH3PXD2A | NM_014631    |
| 2.01 | down | SH3PXD2A | NM_014631    |
| 7.50 | down | SHISA2   | NM_001007538 |
| 2.24 | up   | SHMT1    | NM_004169    |
| 4.01 | down | SIX5     | NM_175875    |
| 5.51 | up   | SLC27A2  | NM_003645    |
| 6.11 | down | SLITRK6  | NM_032229    |
| 4.32 | down | SLITRK6  | NM_032229    |
| 2.04 | down | SLMO1    | NM_006553    |
| 2.49 | down | SMA4     | NR_029426    |
| 2.02 | up   | SNORD105 | NR_004381    |
| 2.17 | up   | SNORD119 | NR_003684    |
| 3.31 | up   | SNORD34  | NR_000019    |
| 3.15 | up   | SNORD45B | NR_002748    |
| 2.12 | up   | SNORD59B | NR_003046    |
| 2.28 | up   | SNORD65  | NR_003054    |
| 2.16 | up   | SNORD67  | NR_003056    |
| 2.35 | down | SOX4     | NM_003107    |
| 2.07 | up   | SPEG     |              |
| 3.16 | up   | SPINK7   | NM_032566    |
| 3.63 | down | SPOCK1   | NM_004598    |
| 2.72 | down | STRA6    | NM_001142620 |
| 2.68 | down | TCF7L2   | NM_030756    |
| 2.17 | down | TCP11L1  | NM_018393    |
| 4.78 | down | TEKT2    | NM_014466    |
| 2.14 | down | TJP2     |              |

|      |      |                |           |
|------|------|----------------|-----------|
| 3.25 | down | TMCC2          | NM_014858 |
| 4.15 | down | TMEM108        | NM_023943 |
| 3.83 | down | TMEM190        | NM_139172 |
| 2.26 | down | TMEM63C        | NM_020431 |
| 4.43 | down | TNFRSF12A      | NM_016639 |
| 3.93 | down | TOB2P1         | NR_002936 |
| 2.43 | down | TPST1          | NM_003596 |
| 2.59 | up   | TREML2         | NM_024807 |
| 3.73 | down | TTC25          | NM_031421 |
| 3.62 | down | TTLL7          | NM_024686 |
| 2.39 | down | TTLL7          | NM_024686 |
| 3.43 | down | VGF            | NM_003378 |
| 2.18 | up   | VTRNA1-1       | NR_026703 |
| 3.34 | down | WDR86          | NM_198285 |
| 2.78 | down | WNT3           | NM_030753 |
| 2.37 | down | WNT5B          | NM_030775 |
| 2.77 | down | XIAP           | NM_001167 |
| 4.61 | down | XLOC_000587    |           |
| 3.77 | down | XLOC_000587    | AK124056  |
| 2.66 | down | XLOC_000647    | CR617576  |
| 2.21 | up   | XLOC_002323    |           |
| 2.12 | down | XLOC_003515    | BX110533  |
| 2.12 | up   | XLOC_003546    | AL833514  |
| 4.34 | down | XLOC_004229    |           |
| 2.09 | up   | XLOC_004456    |           |
| 3.13 | up   | XLOC_004643    | DB301429  |
| 3.54 | down | XLOC_005361    |           |
| 2.50 | up   | XLOC_005490    |           |
| 3.02 | down | XLOC_006721    |           |
| 3.20 | down | XLOC_007467    |           |
| 2.17 | up   | XLOC_007607    |           |
| 4.23 | up   | XLOC_009120    |           |
| 3.35 | down | XLOC_011052    |           |
| 2.80 | down | XLOC_012467    |           |
| 3.62 | up   | XLOC_013737    | AK090932  |
| 3.67 | down | XLOC_12_001011 | BC030750  |
| 5.61 | up   | XLOC_12_003897 |           |
| 2.48 | up   | XLOC_12_008009 |           |
| 2.01 | down | XLOC_12_008031 |           |
| 3.16 | down | XLOC_12_008203 |           |
| 2.73 | down | XLOC_12_008203 |           |
| 2.69 | down | XLOC_12_008288 | CD557693  |
| 9.53 | down | XLOC_12_009332 | AK096564  |
| 2.91 | down | XLOC_12_009332 |           |
| 3.62 | up   | XLOC_12_009539 |           |
| 2.12 | down | XLOC_12_011204 | BX104493  |
| 2.01 | down | XLOC_12_011204 | BX104493  |
| 2.90 | down | XLOC_12_012925 |           |
| 2.25 | up   | XLOC_12_015878 |           |

|      |      |        |              |
|------|------|--------|--------------|
| 2.26 | down | ZBED1  | NM_001171135 |
| 2.15 | down | ZNF514 | NM_032788    |
| 2.10 | up   | ZNF799 | NM_001080821 |
| 3.10 | down |        | AK130638     |
| 3.02 | up   |        | BX115224     |
| 2.62 | up   |        | Y15200       |
| 2.30 | up   |        | BU535024     |
| 2.22 | up   |        | X15019       |
| 2.17 | down |        | AF264629     |
| 2.13 | up   |        | DB028131     |
| 2.08 | up   |        | AF239727     |
| 2.07 | down |        | XM_003118656 |
| 2.05 | up   |        | BC071639     |
| 2.02 | down |        | AK025716     |
